# Supplementary material for: Repeated gain and loss of a single gene modulates the evolution of vascular plant pathogen lifestyles
Source: PubMed Central journal article supplement (PMC7673761; doi:10.1126/sciadv.abc4516), 2020-11-13
Supplement: abc4516_Figure_S7.pdf [file abc4516_Figure_S7.pdf]

a) OG0003189 (carboxylesterase)

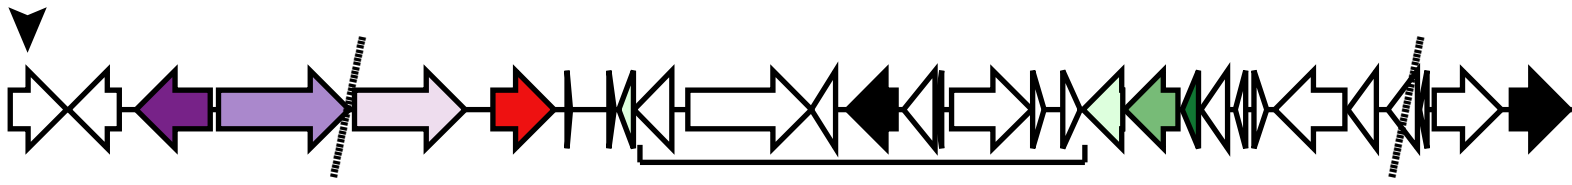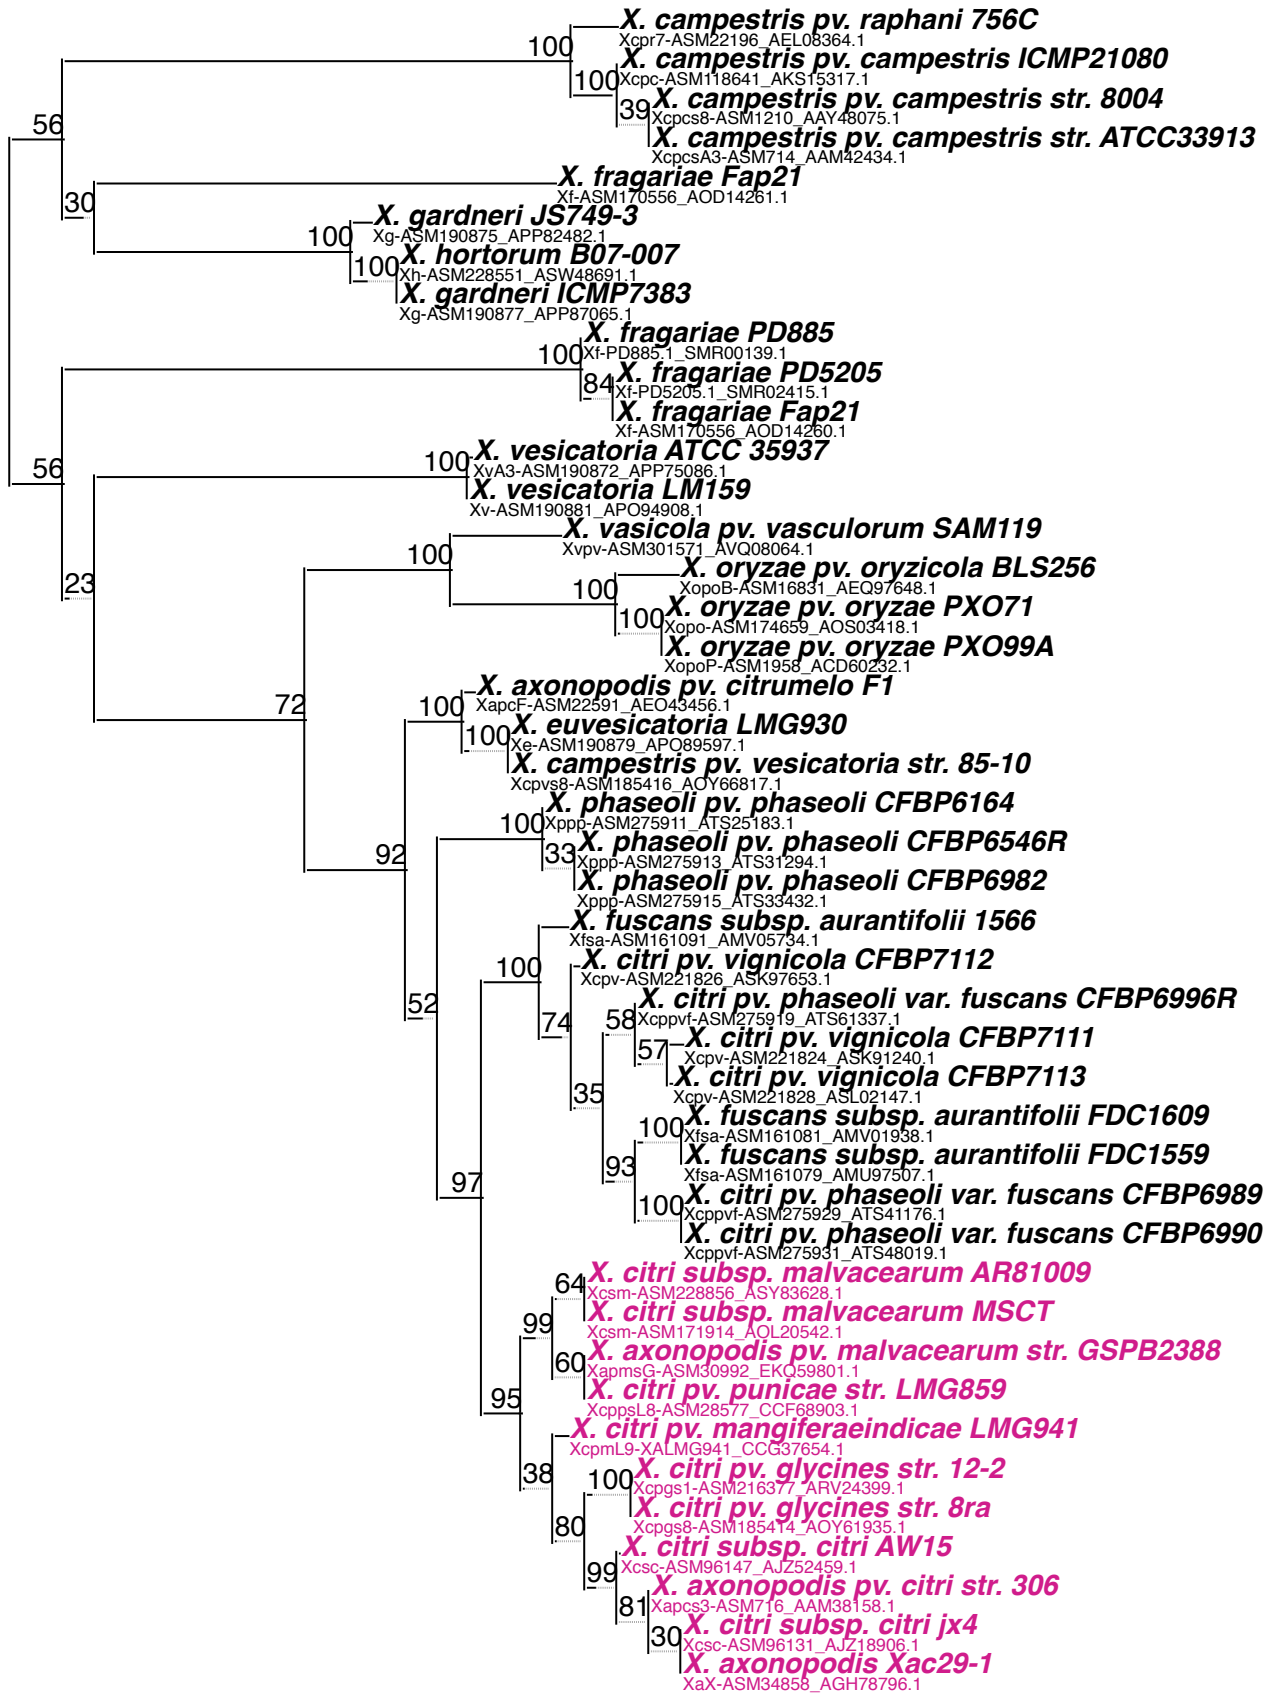

0.07

b) OG0003864 (function unknown)

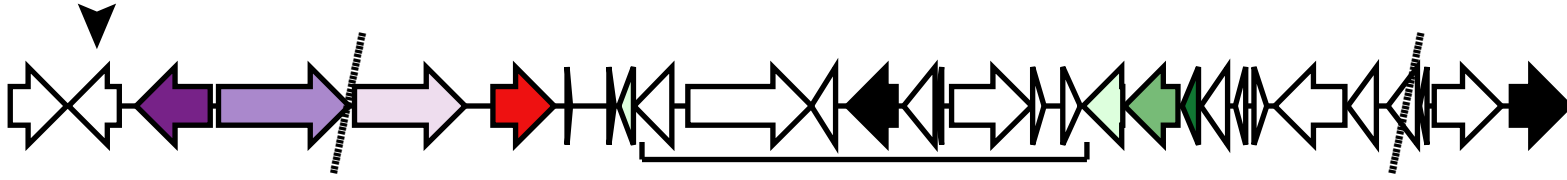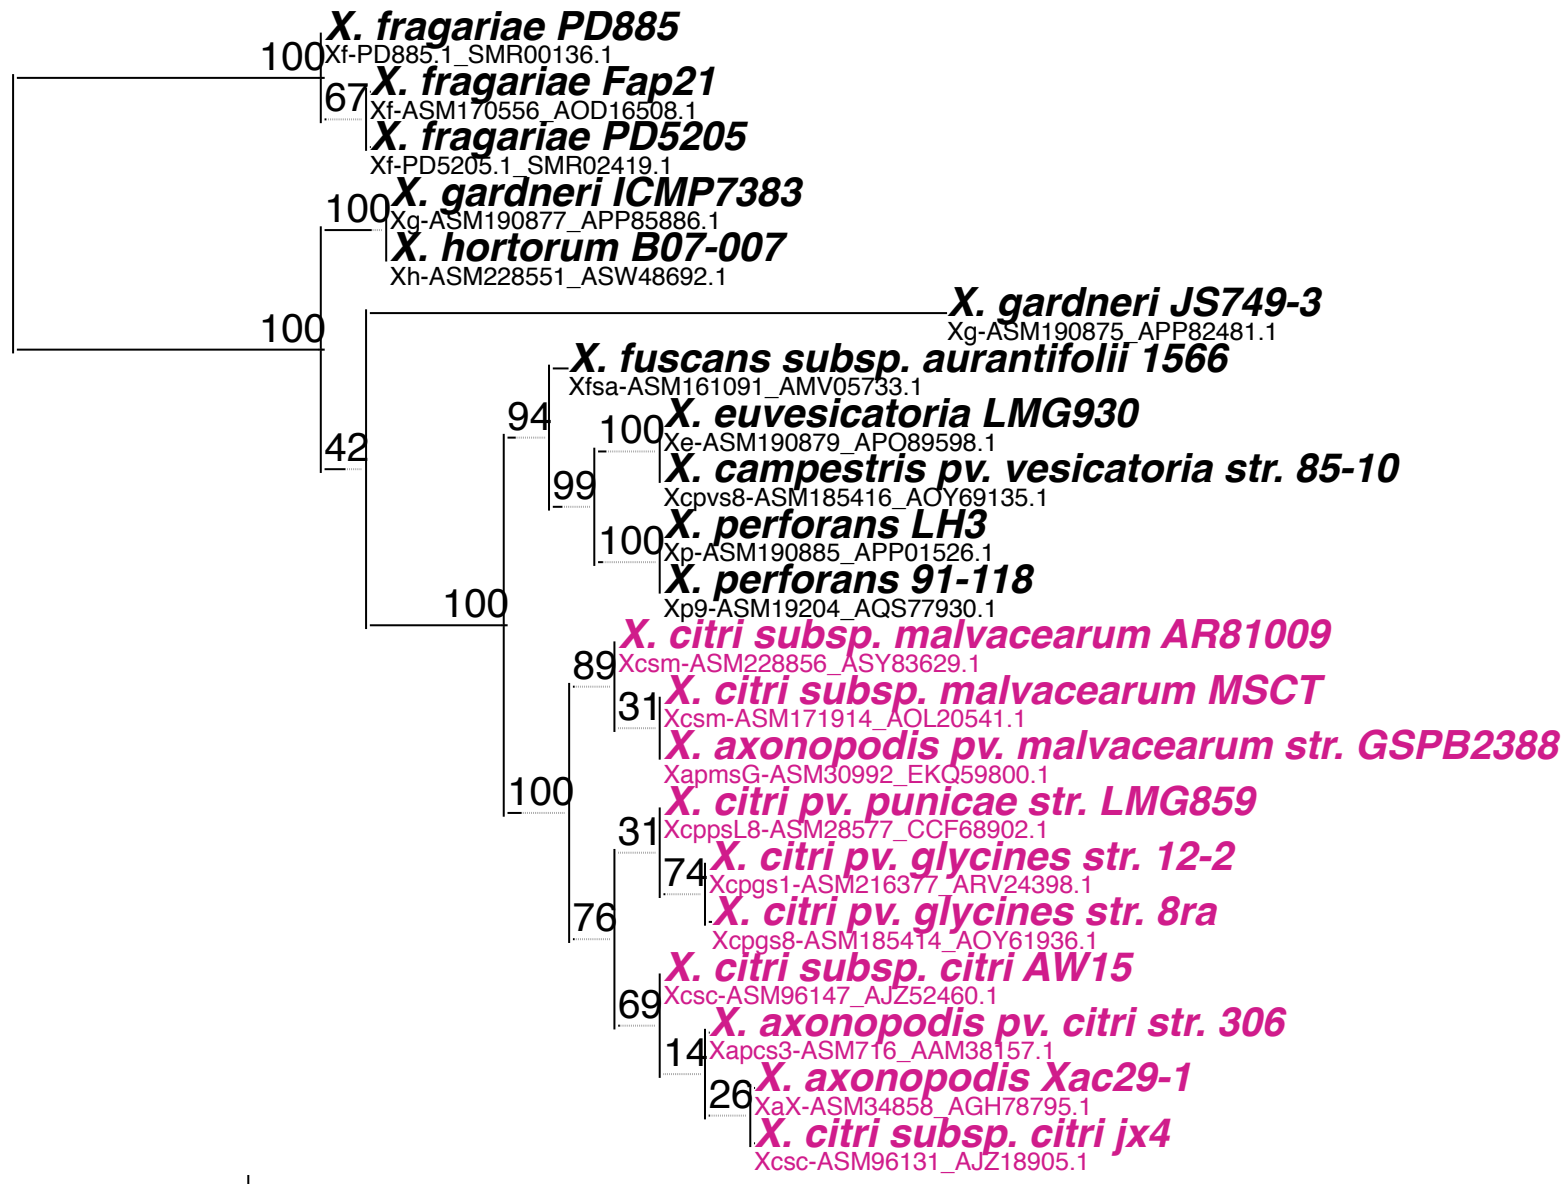

0.12

c) OG0001138 (alpha-glucosidase)

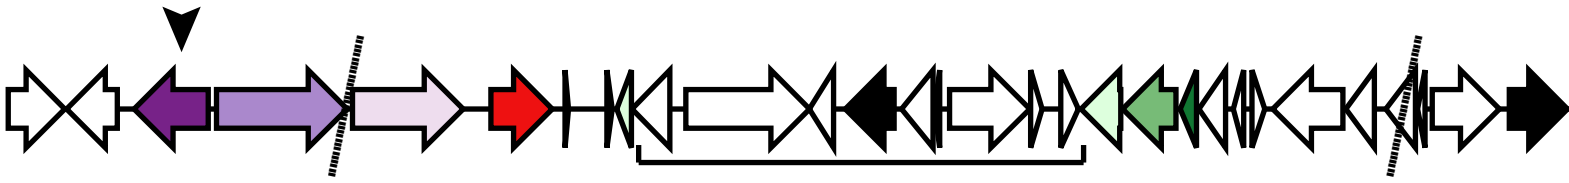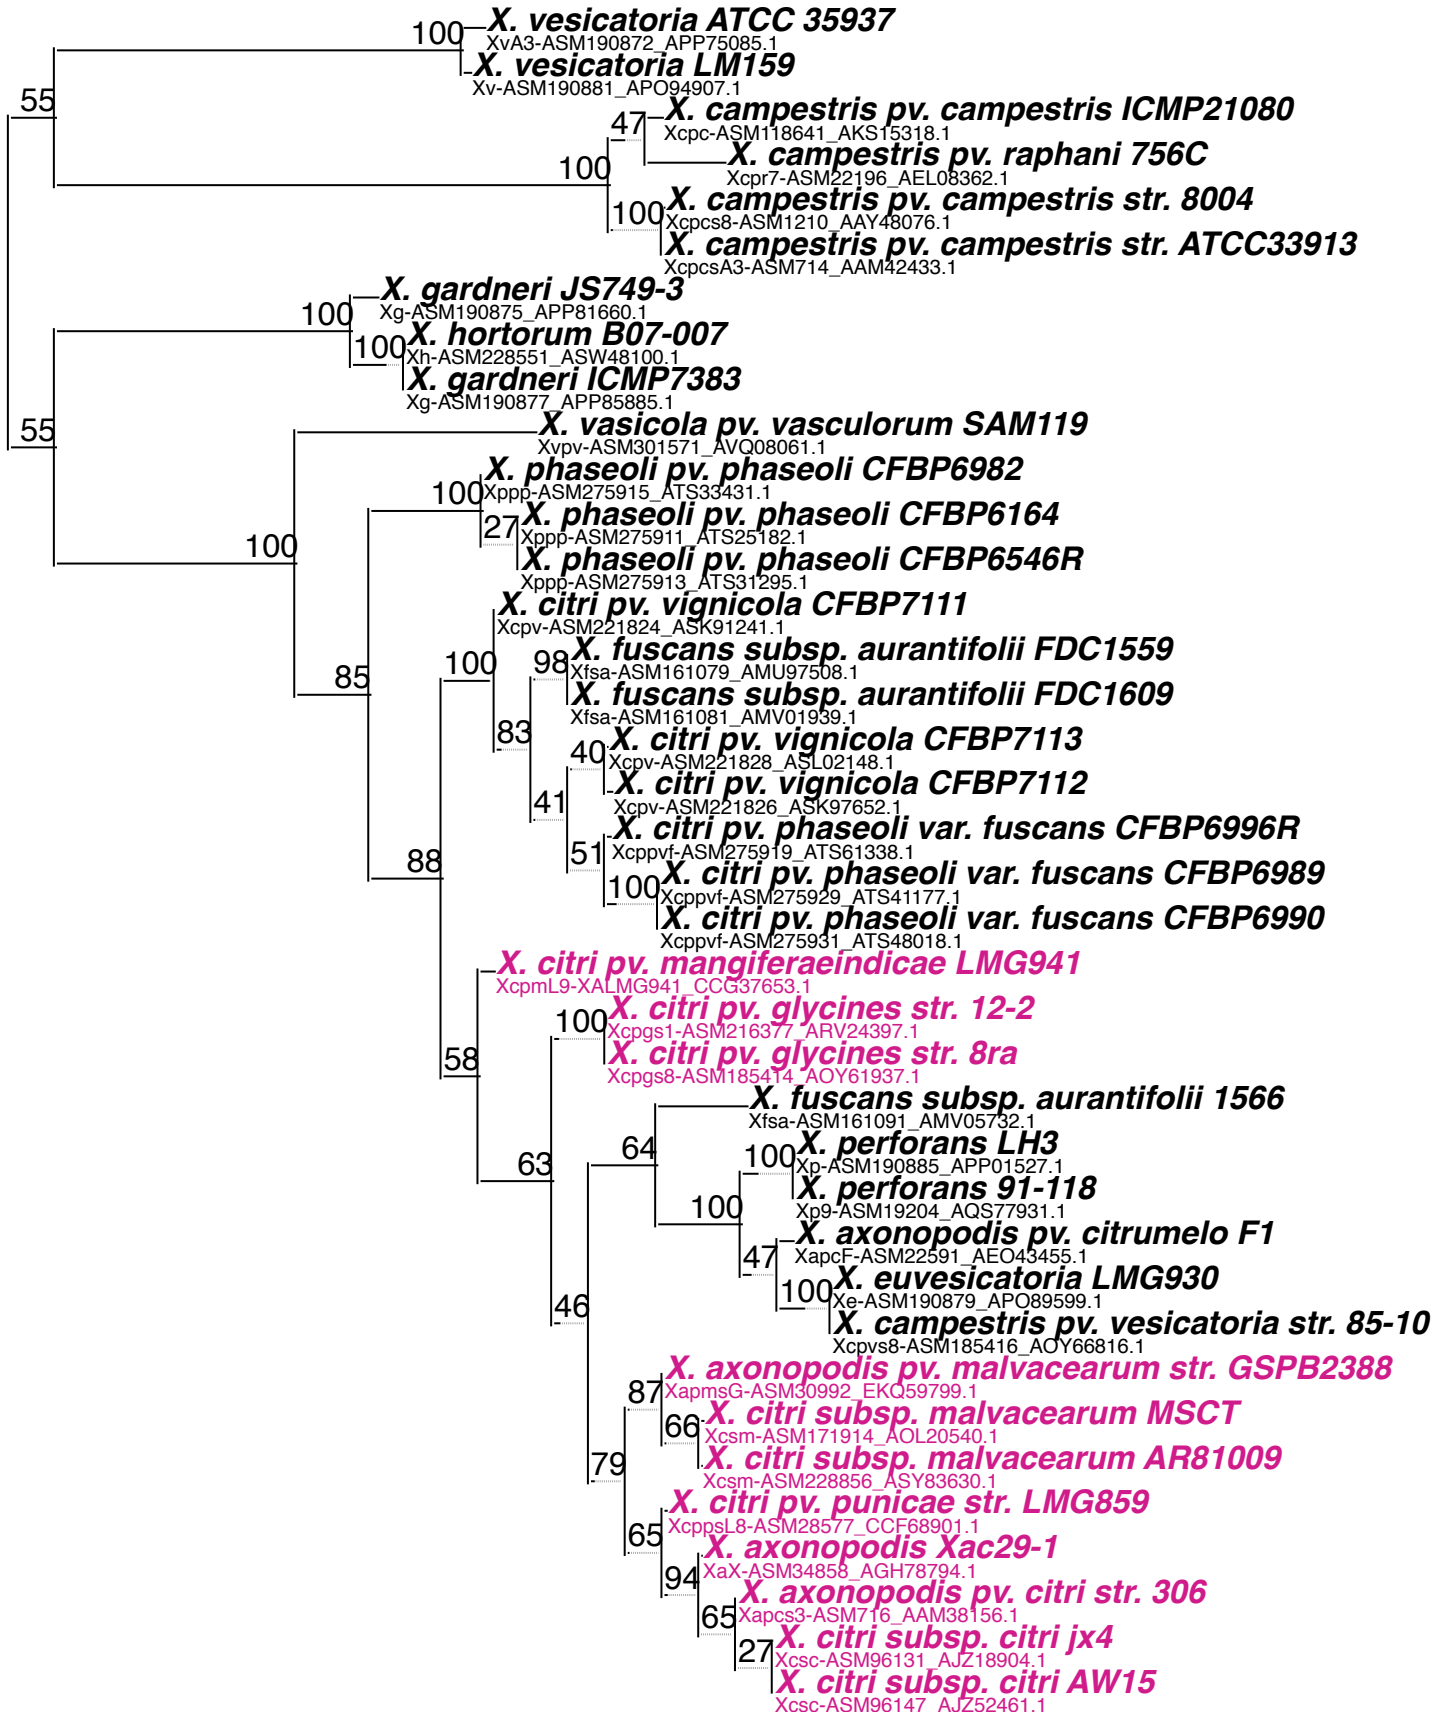

0.07

d) OG0003475 (hydrolase family 2, sugar binding)

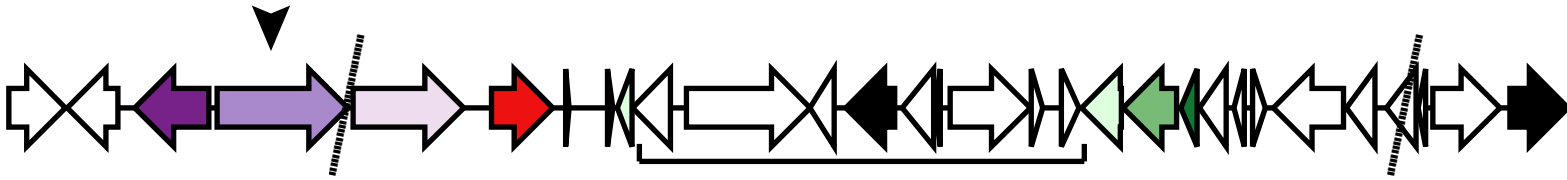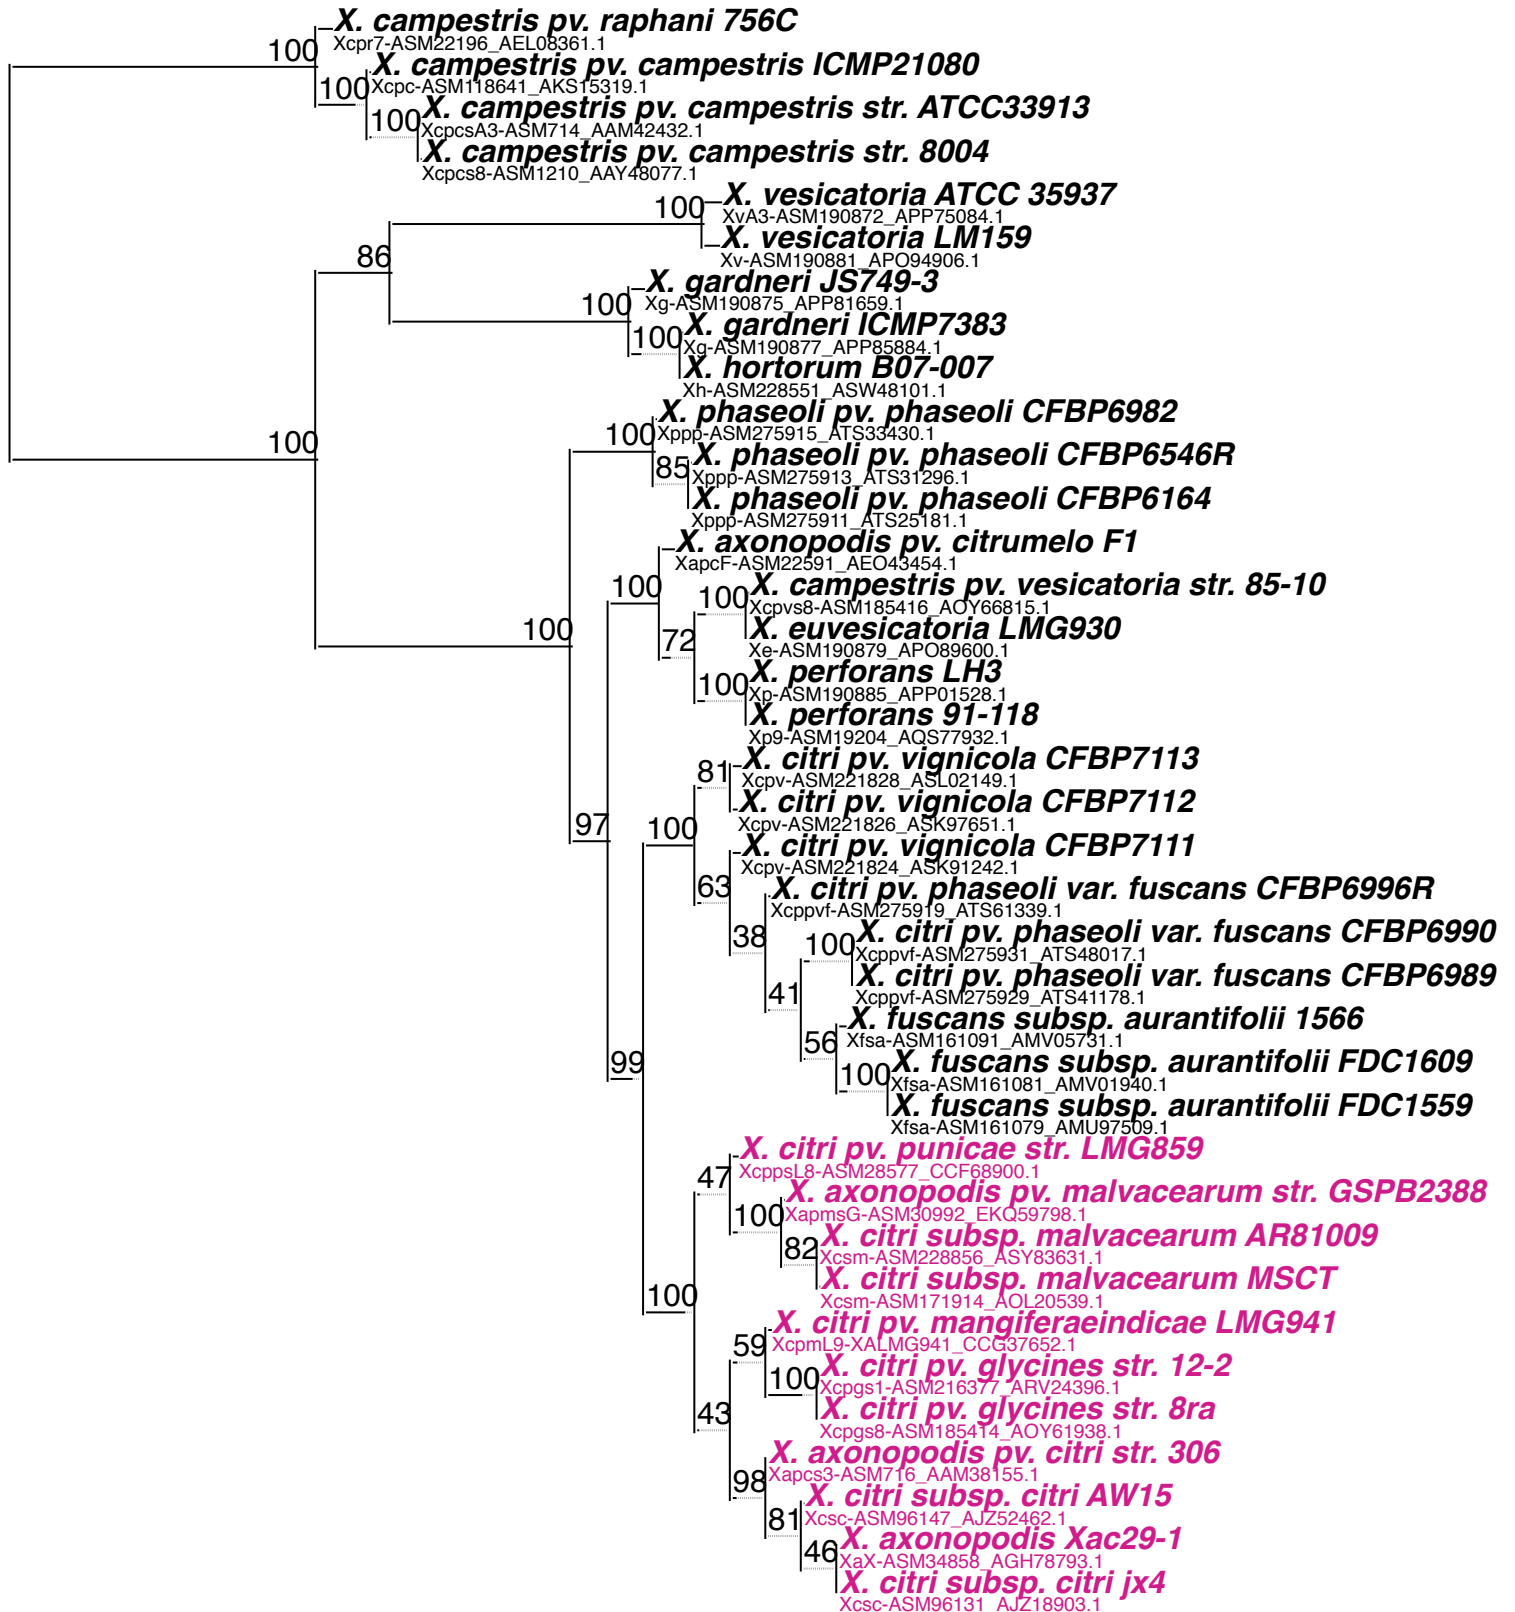

0.08

e) OG0003407 (tonB-dependent receptor)

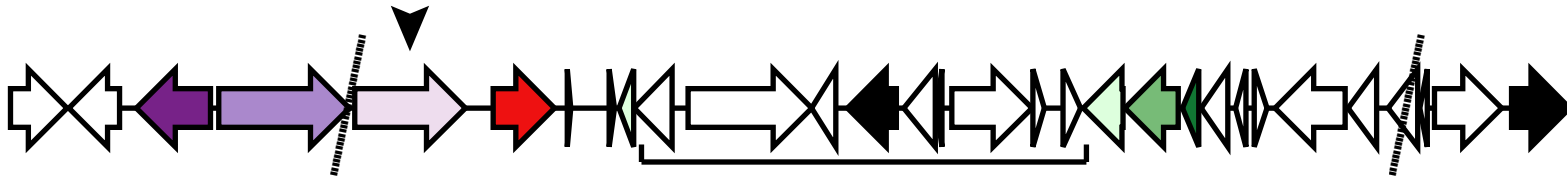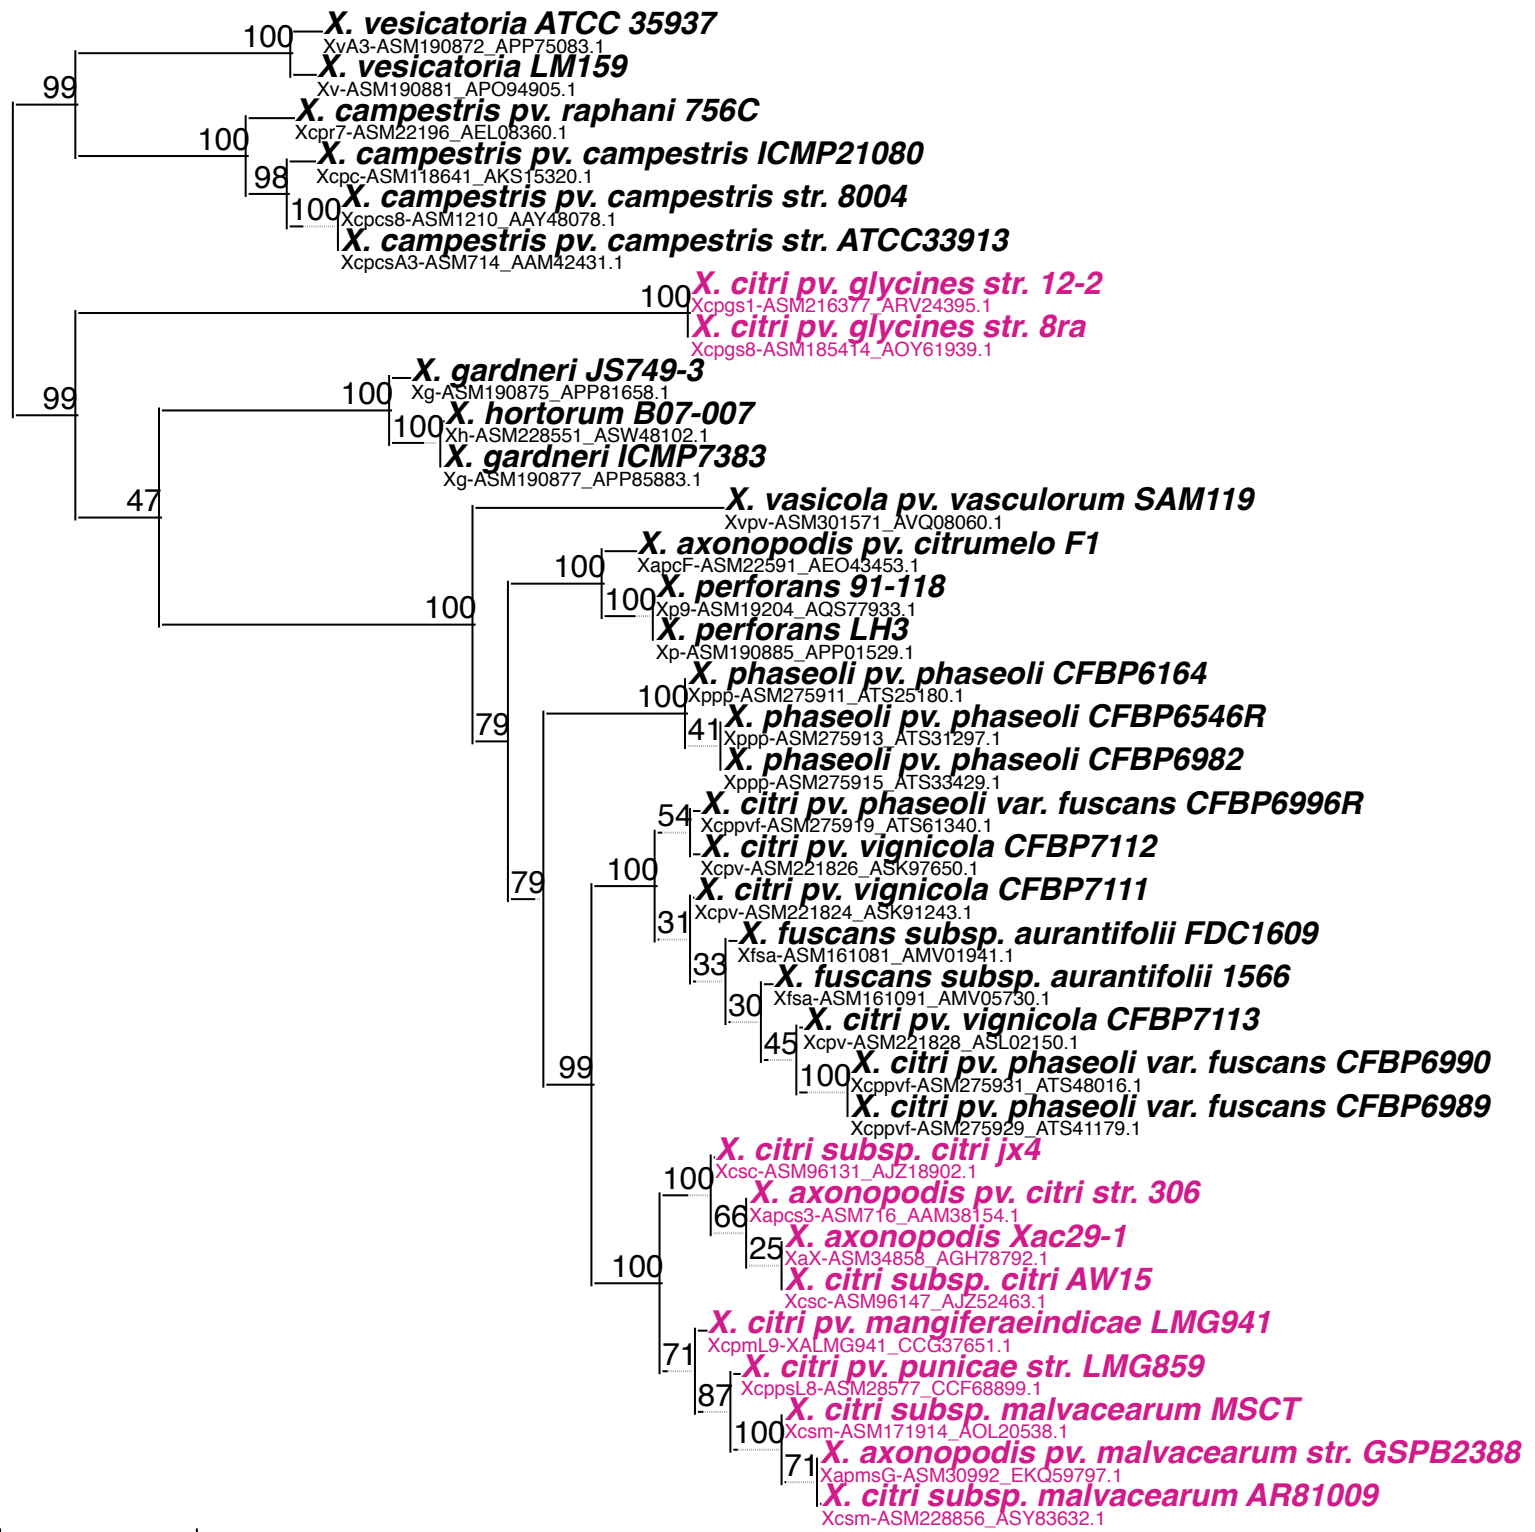

0.04



f) OG0006923 (cytochrome p450 domain-containing protein)

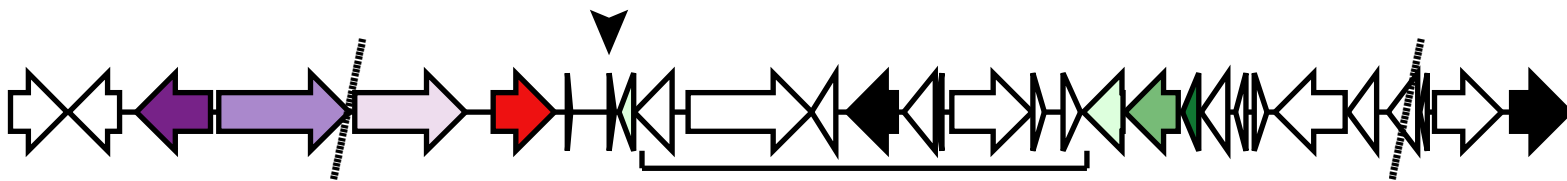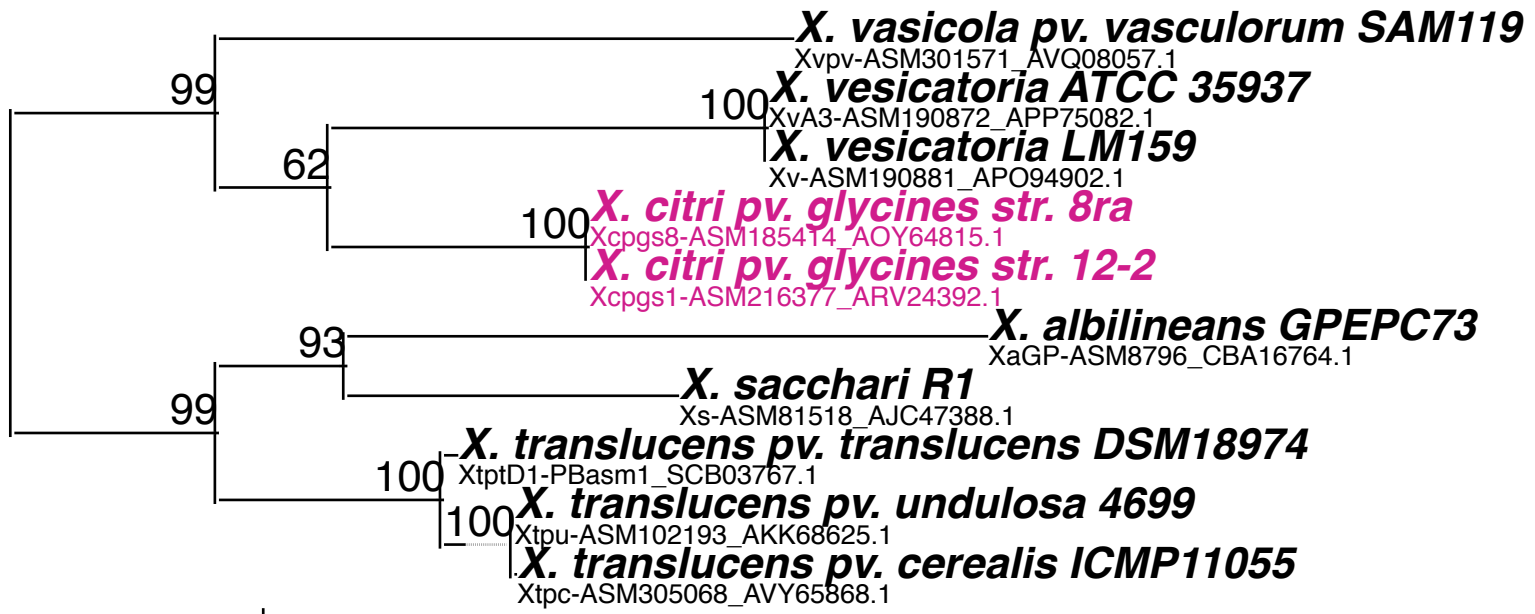

0.10

g) OG0000202 (transcription regulator, LacI family)

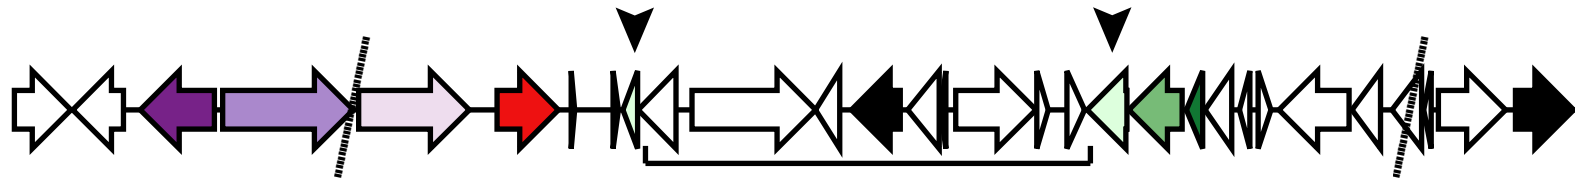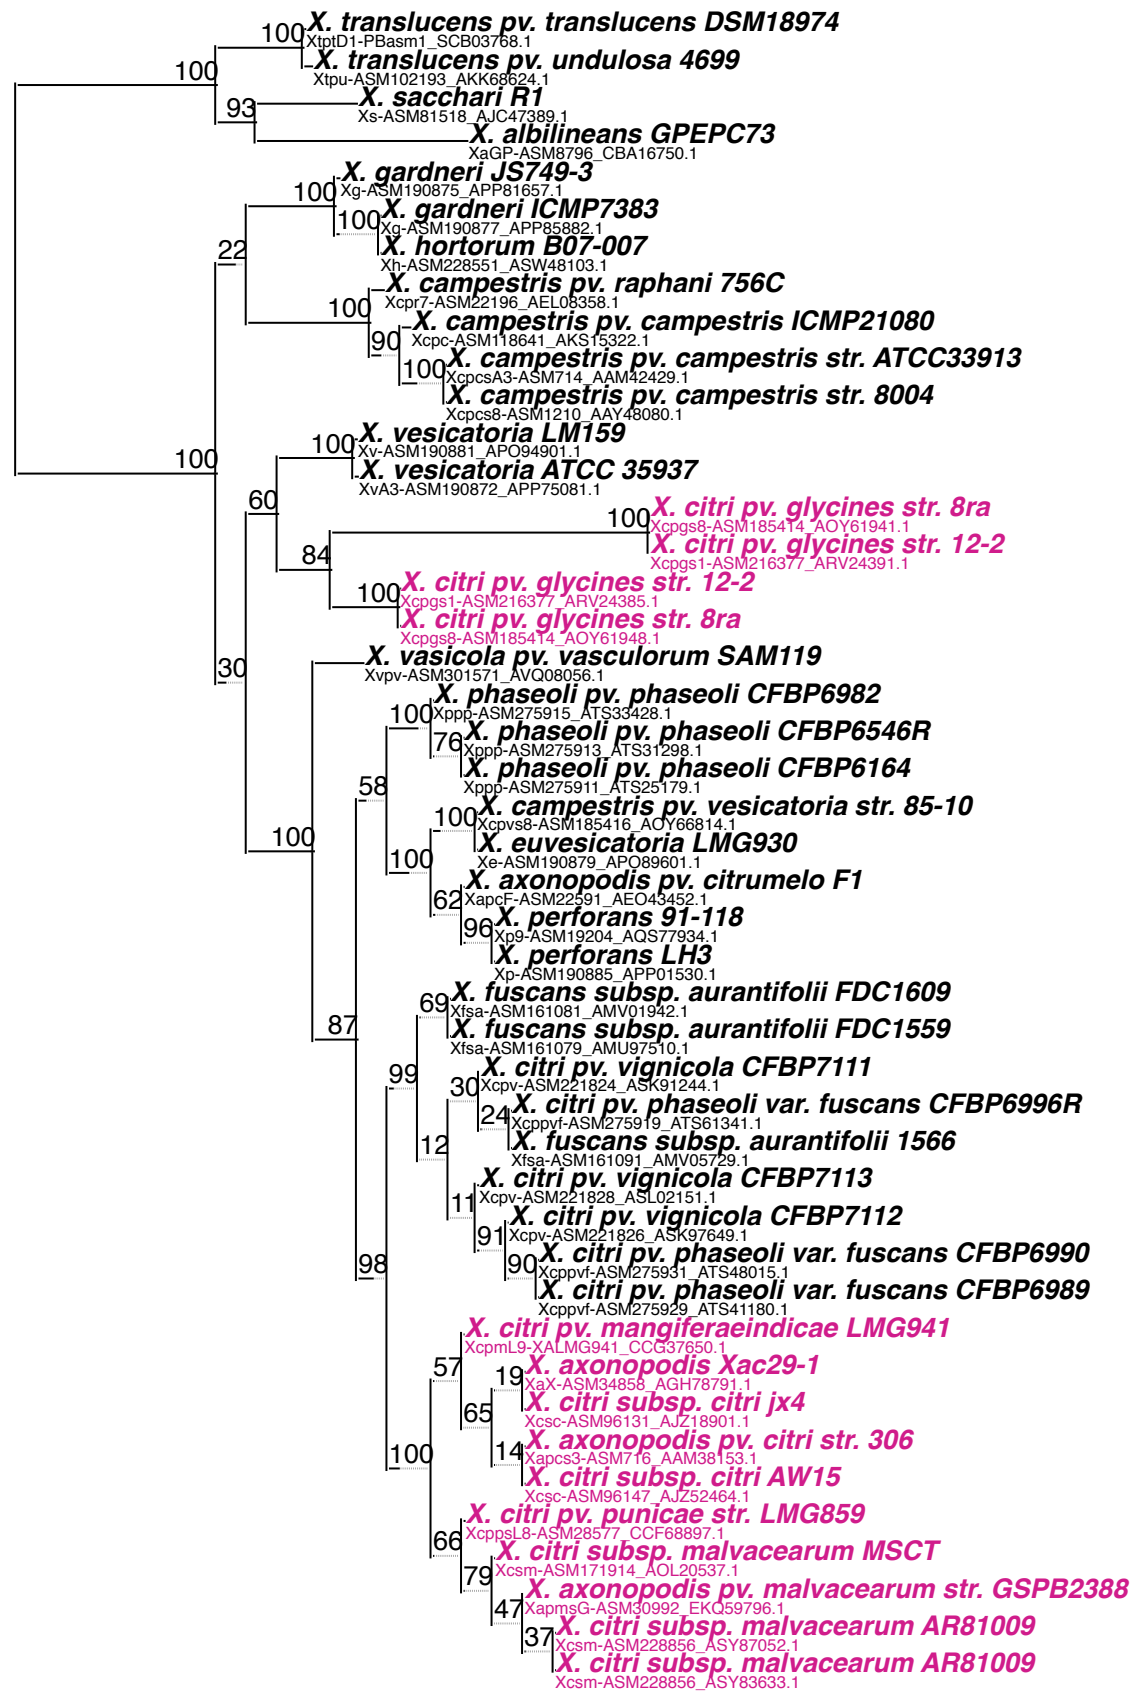

0.17





i) OG0006653 (histidine kinase)

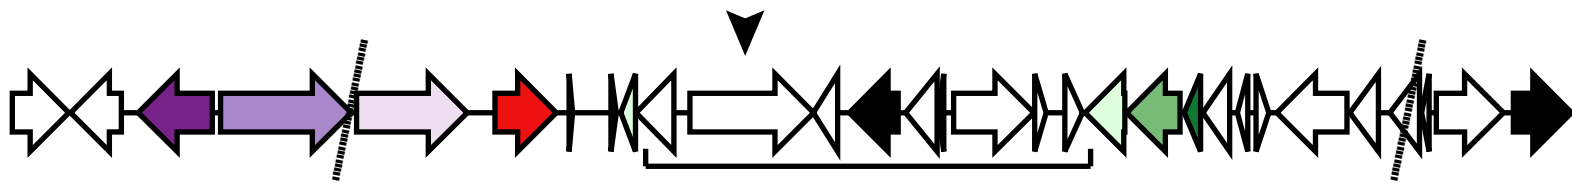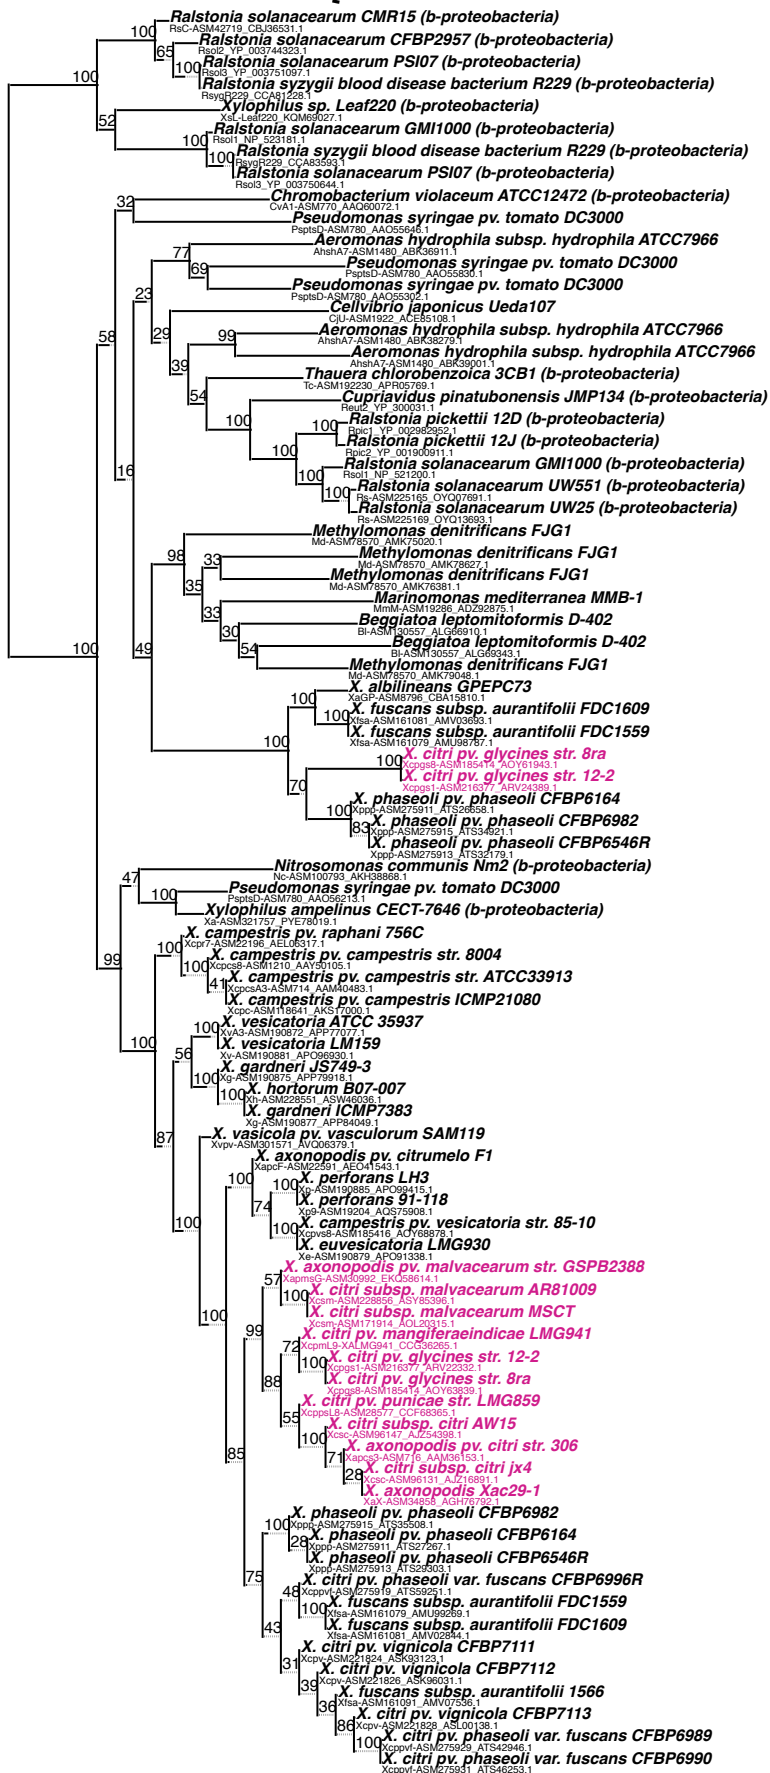

0.52



k) OG0005040 (function unknown)

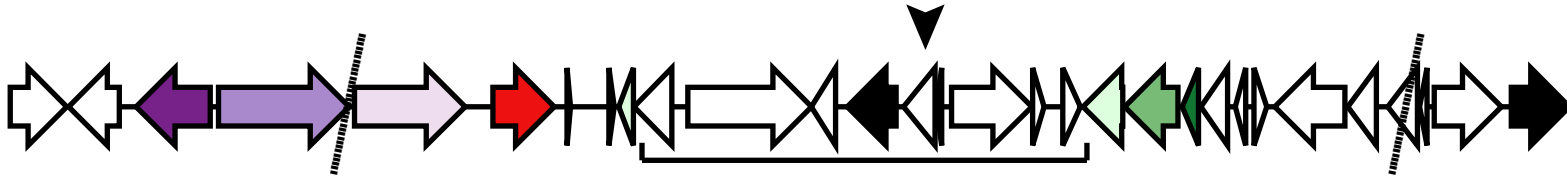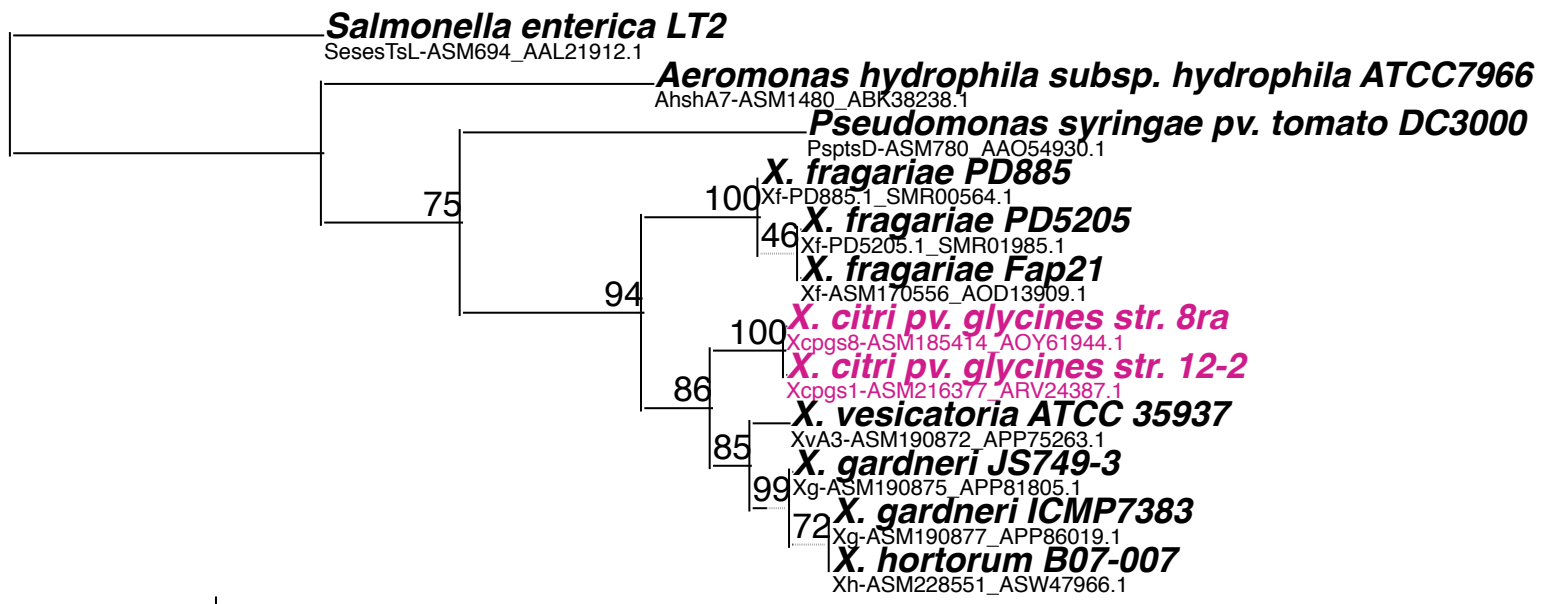

0.37



m) OG0004674 (function unknown)

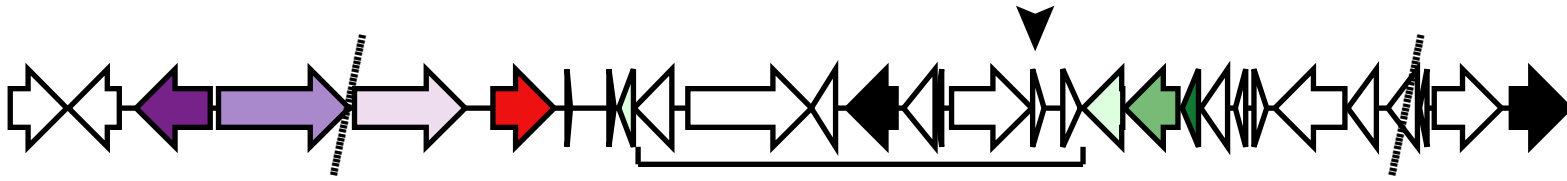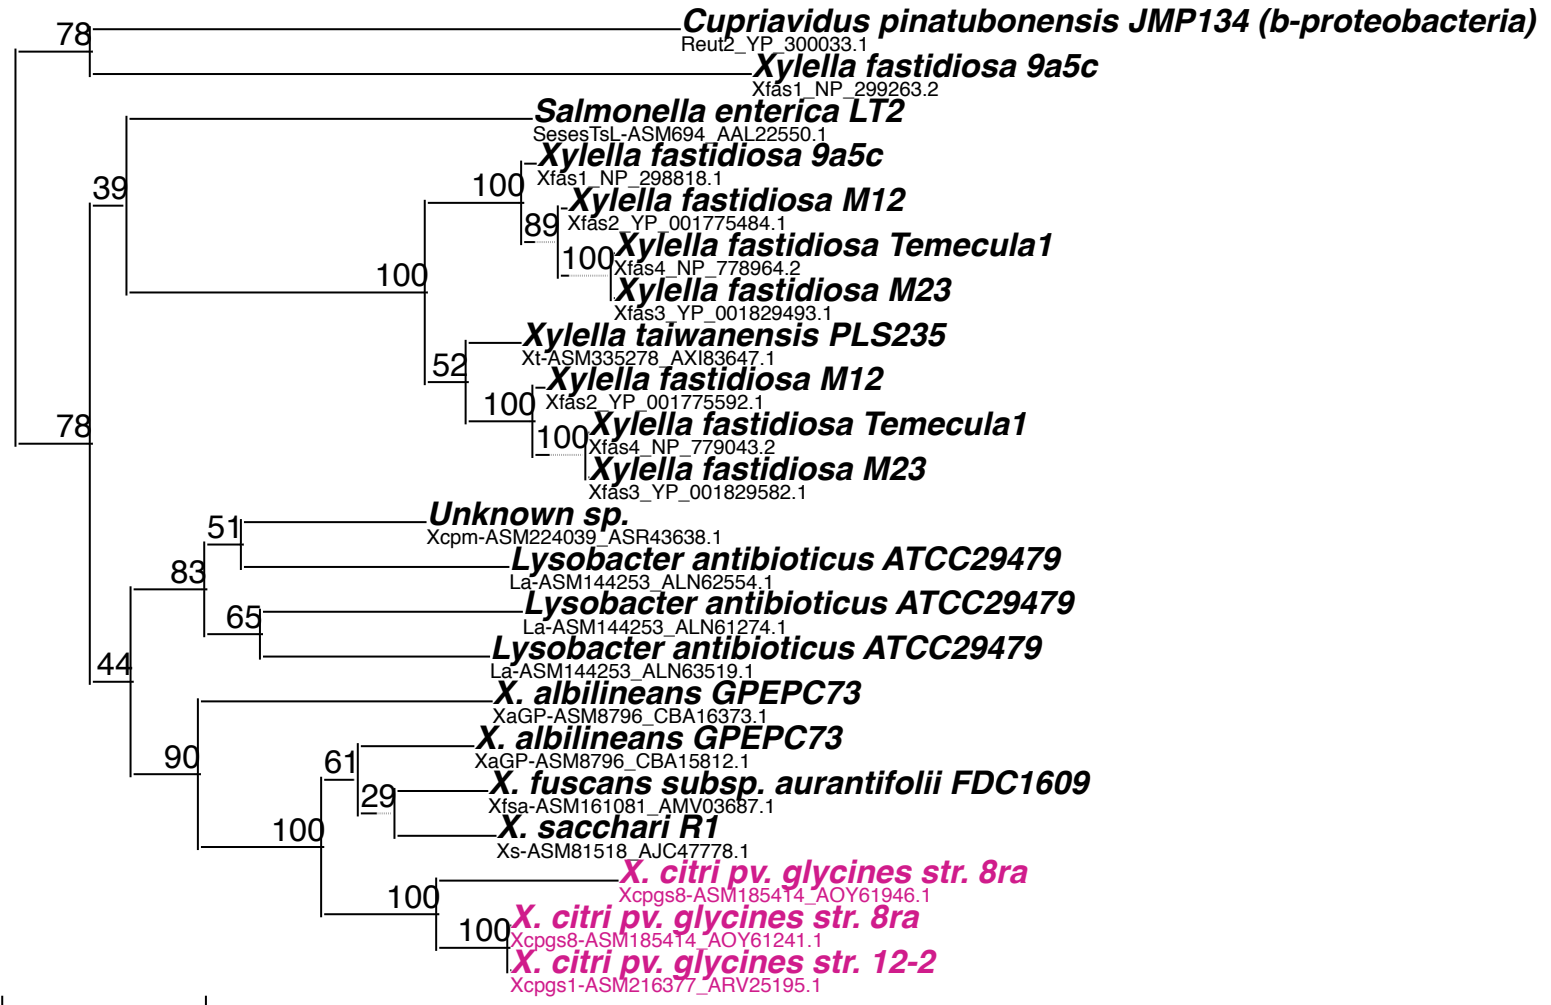

0.31



n) OG0005551 (CDP-diacylglycerol pyrophosphatase)

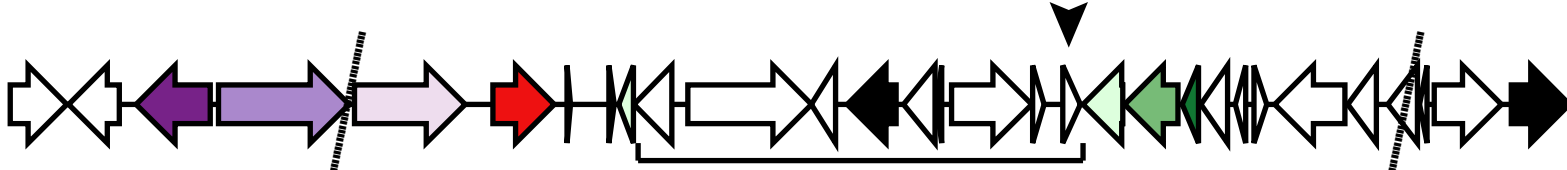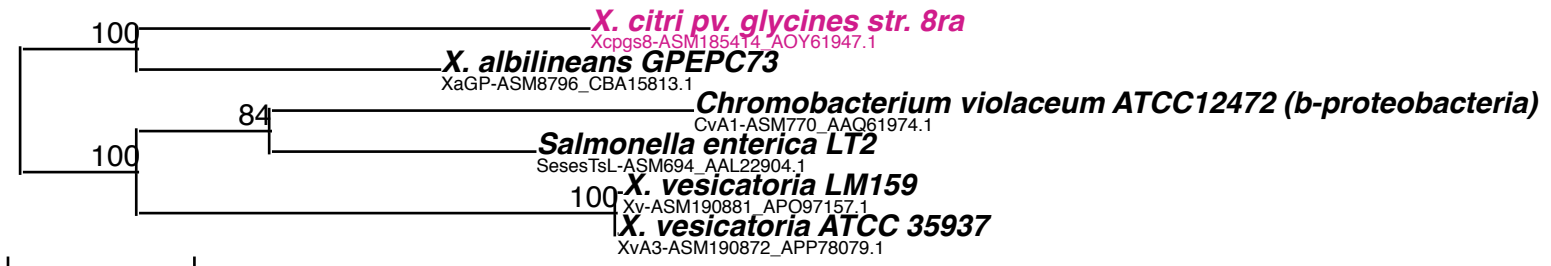

0.30

o) OG0003060 (peptidase m28)

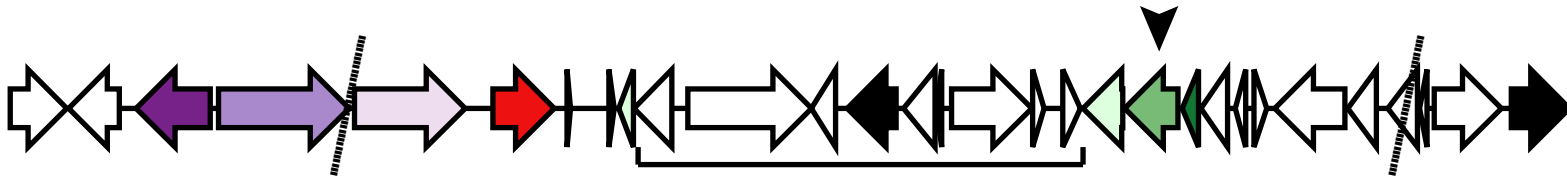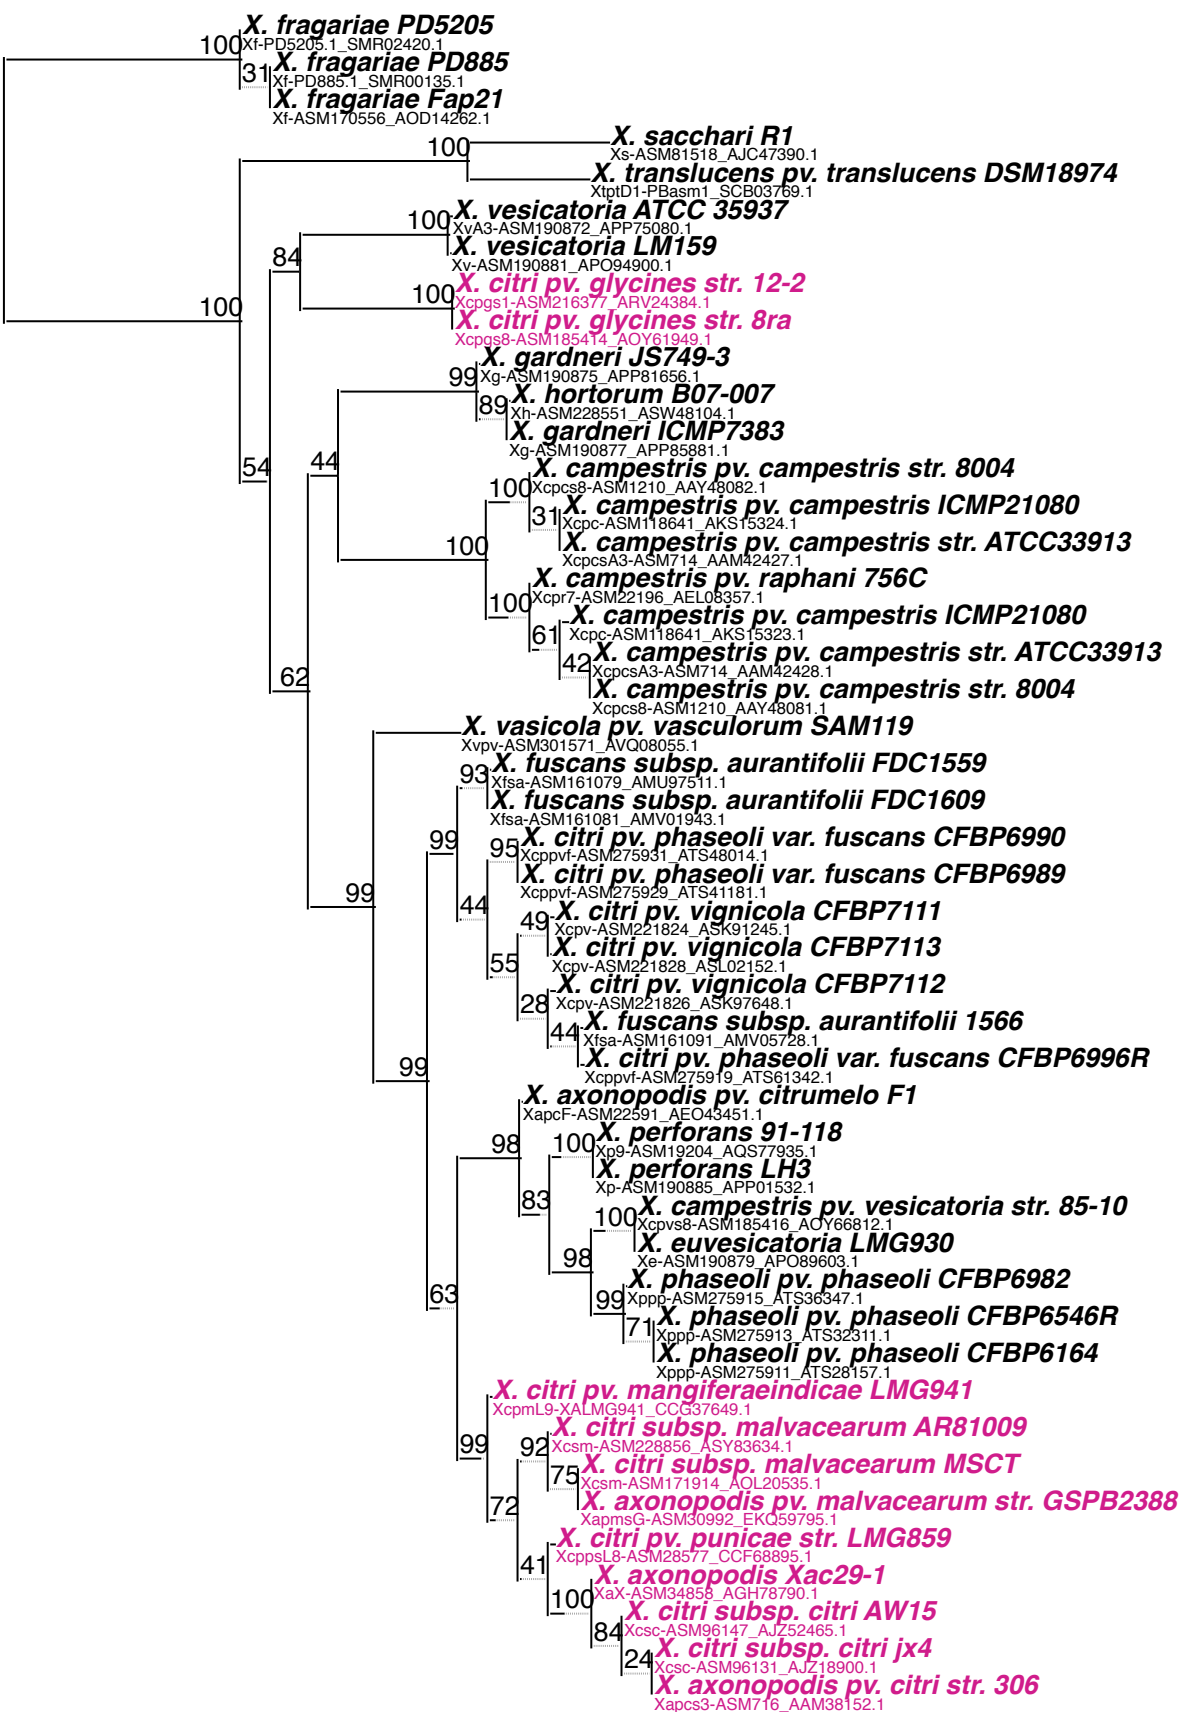

0.09

p) OG0001360 (large-conductance mechanosensitive ion channel)

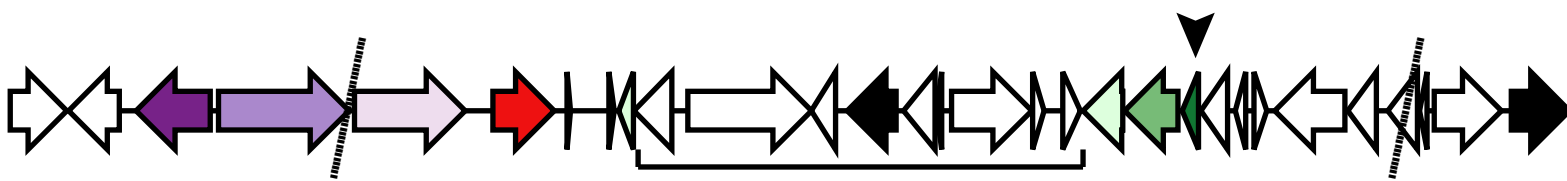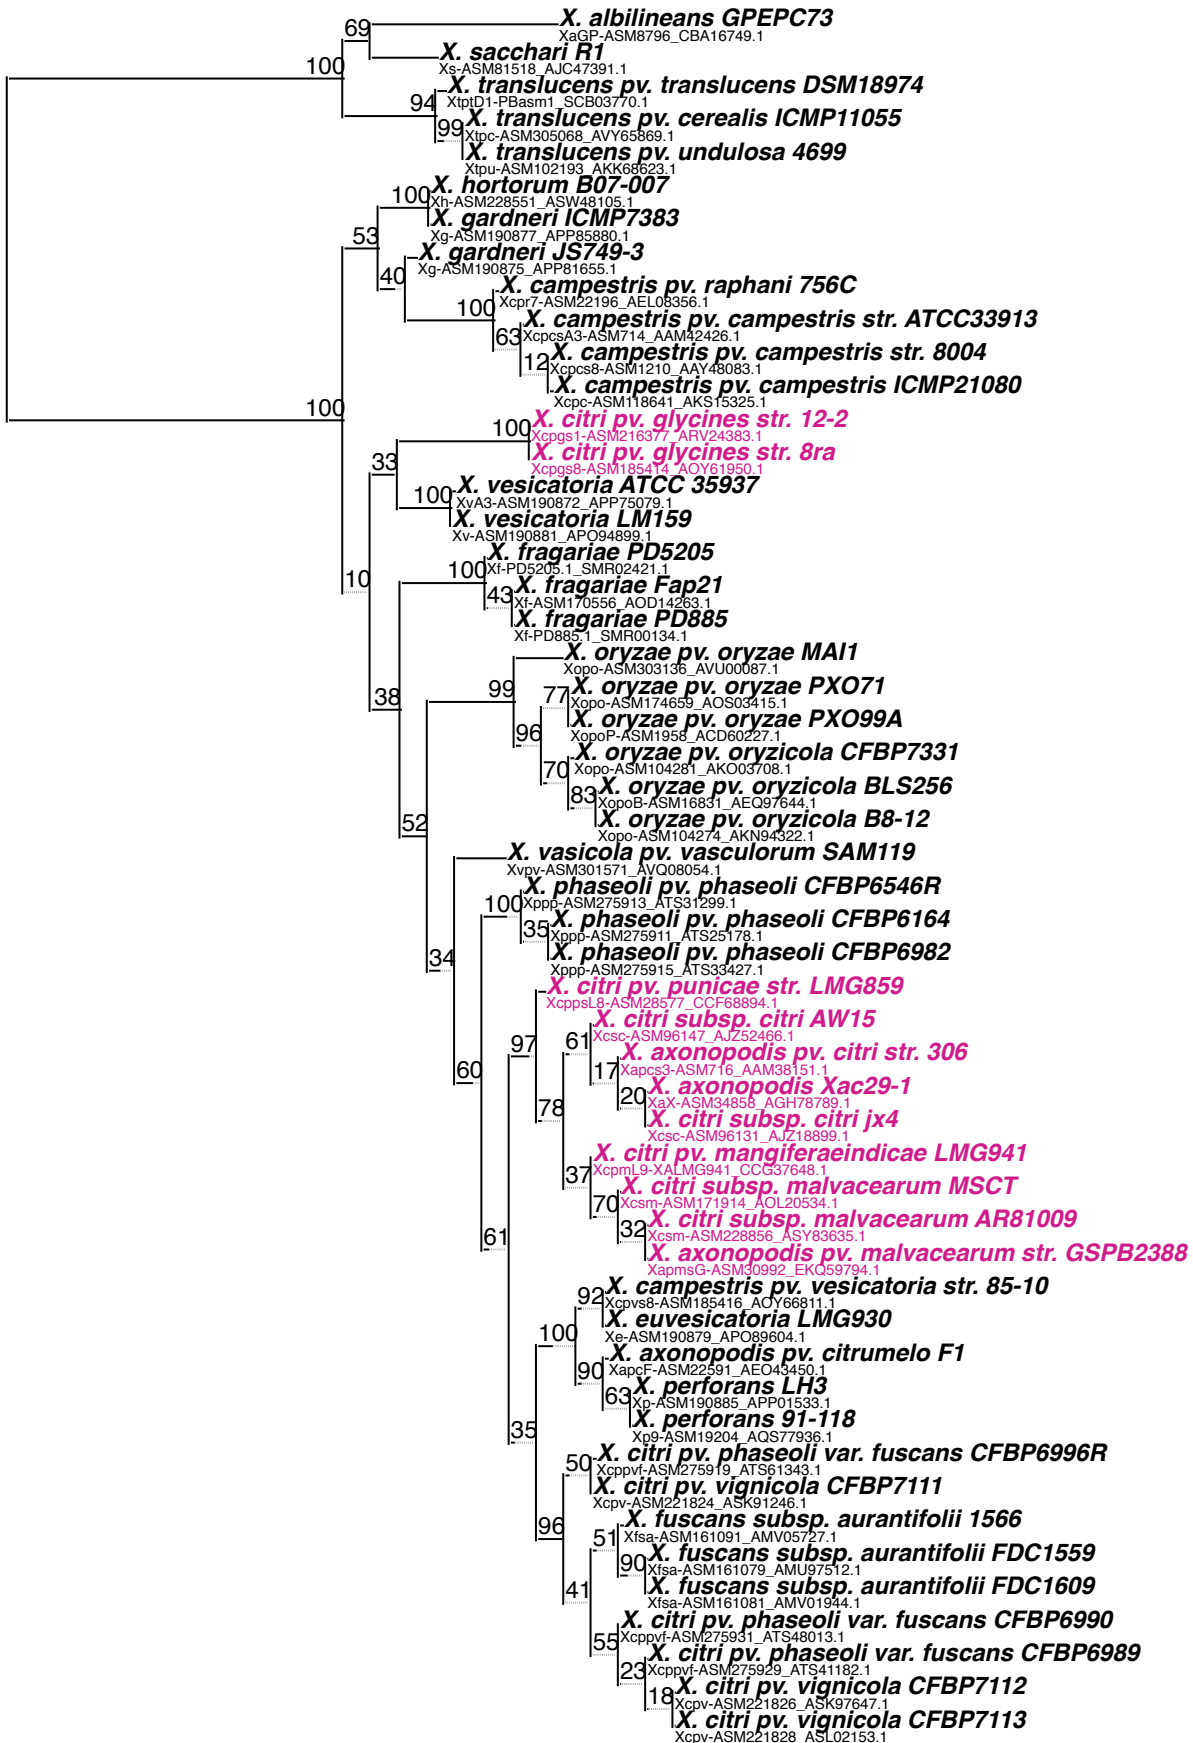

0.10

q) OG0000926 (fumarylacetoacetate hydrolase)

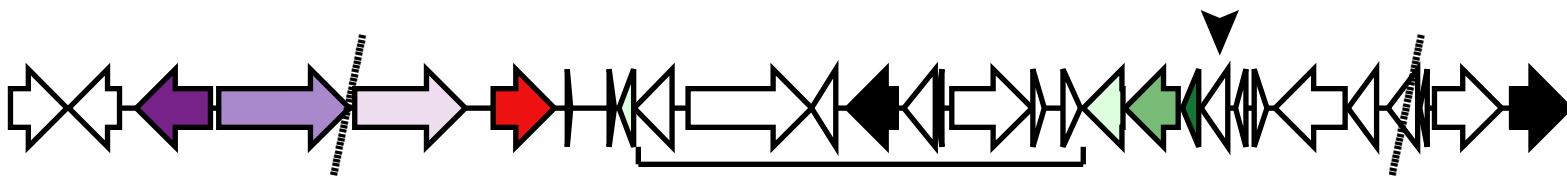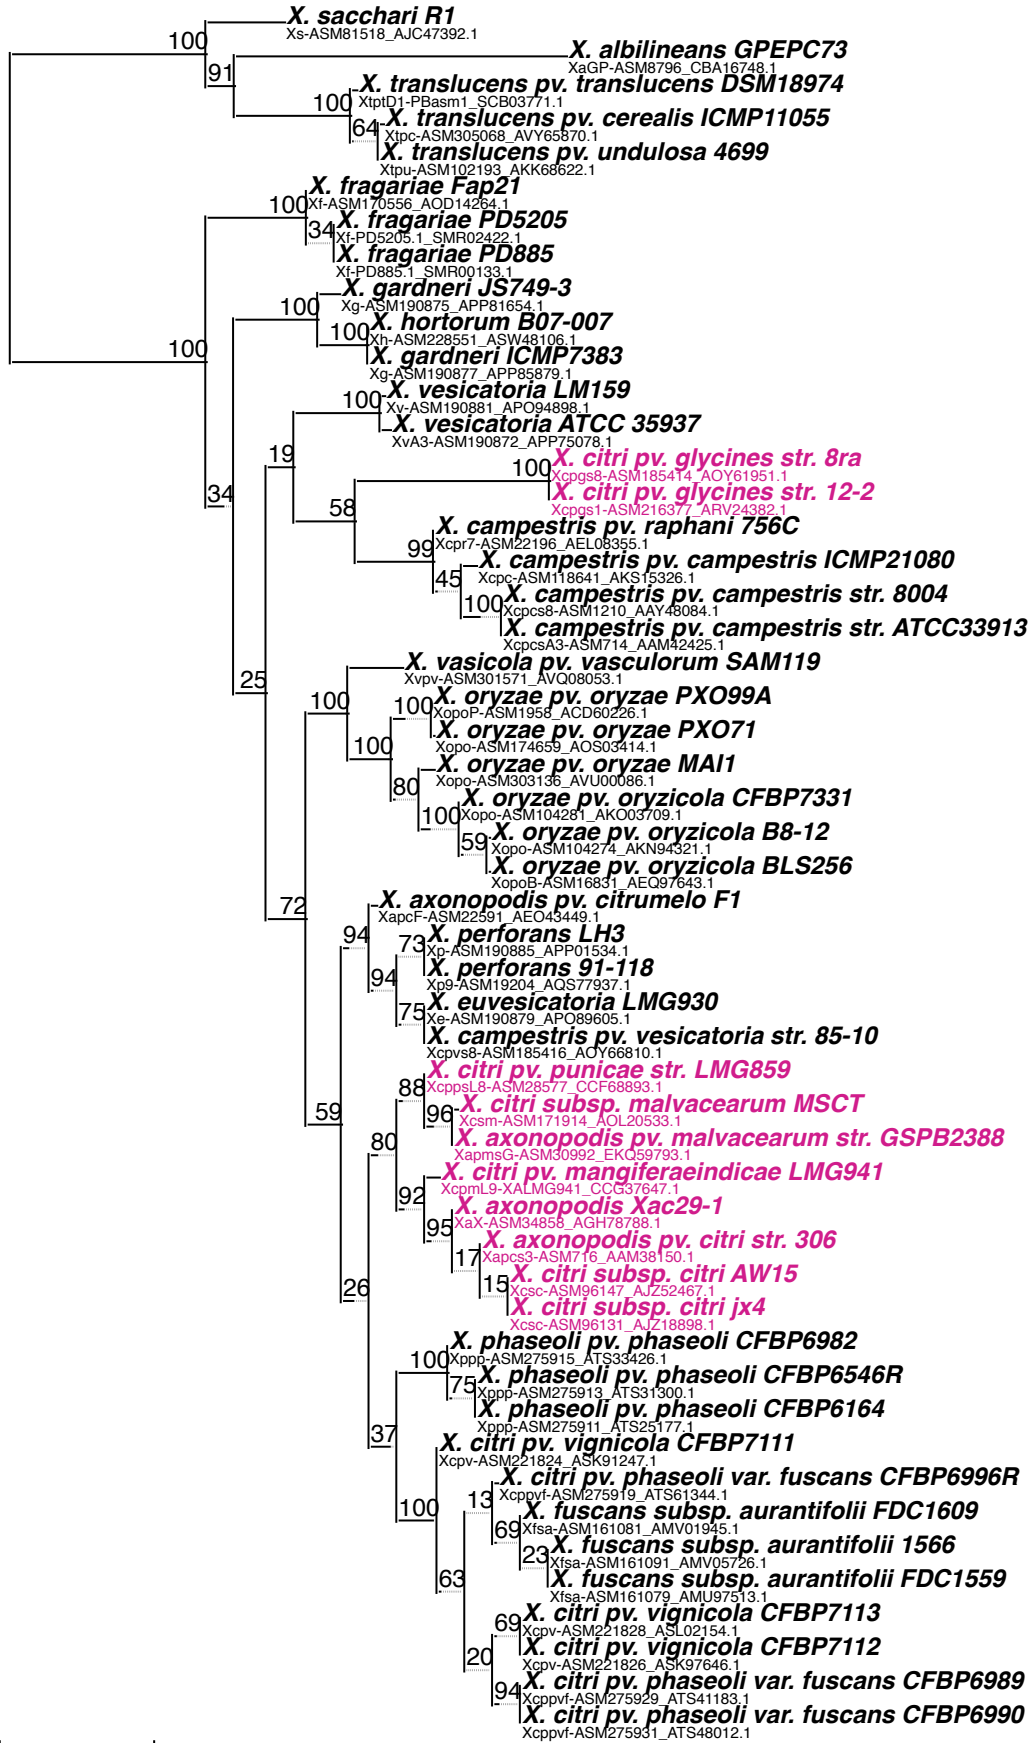

0.09

r) OG0002126 (function unknown)

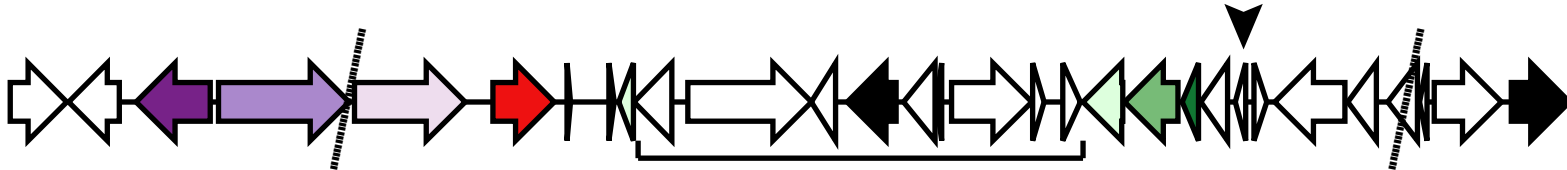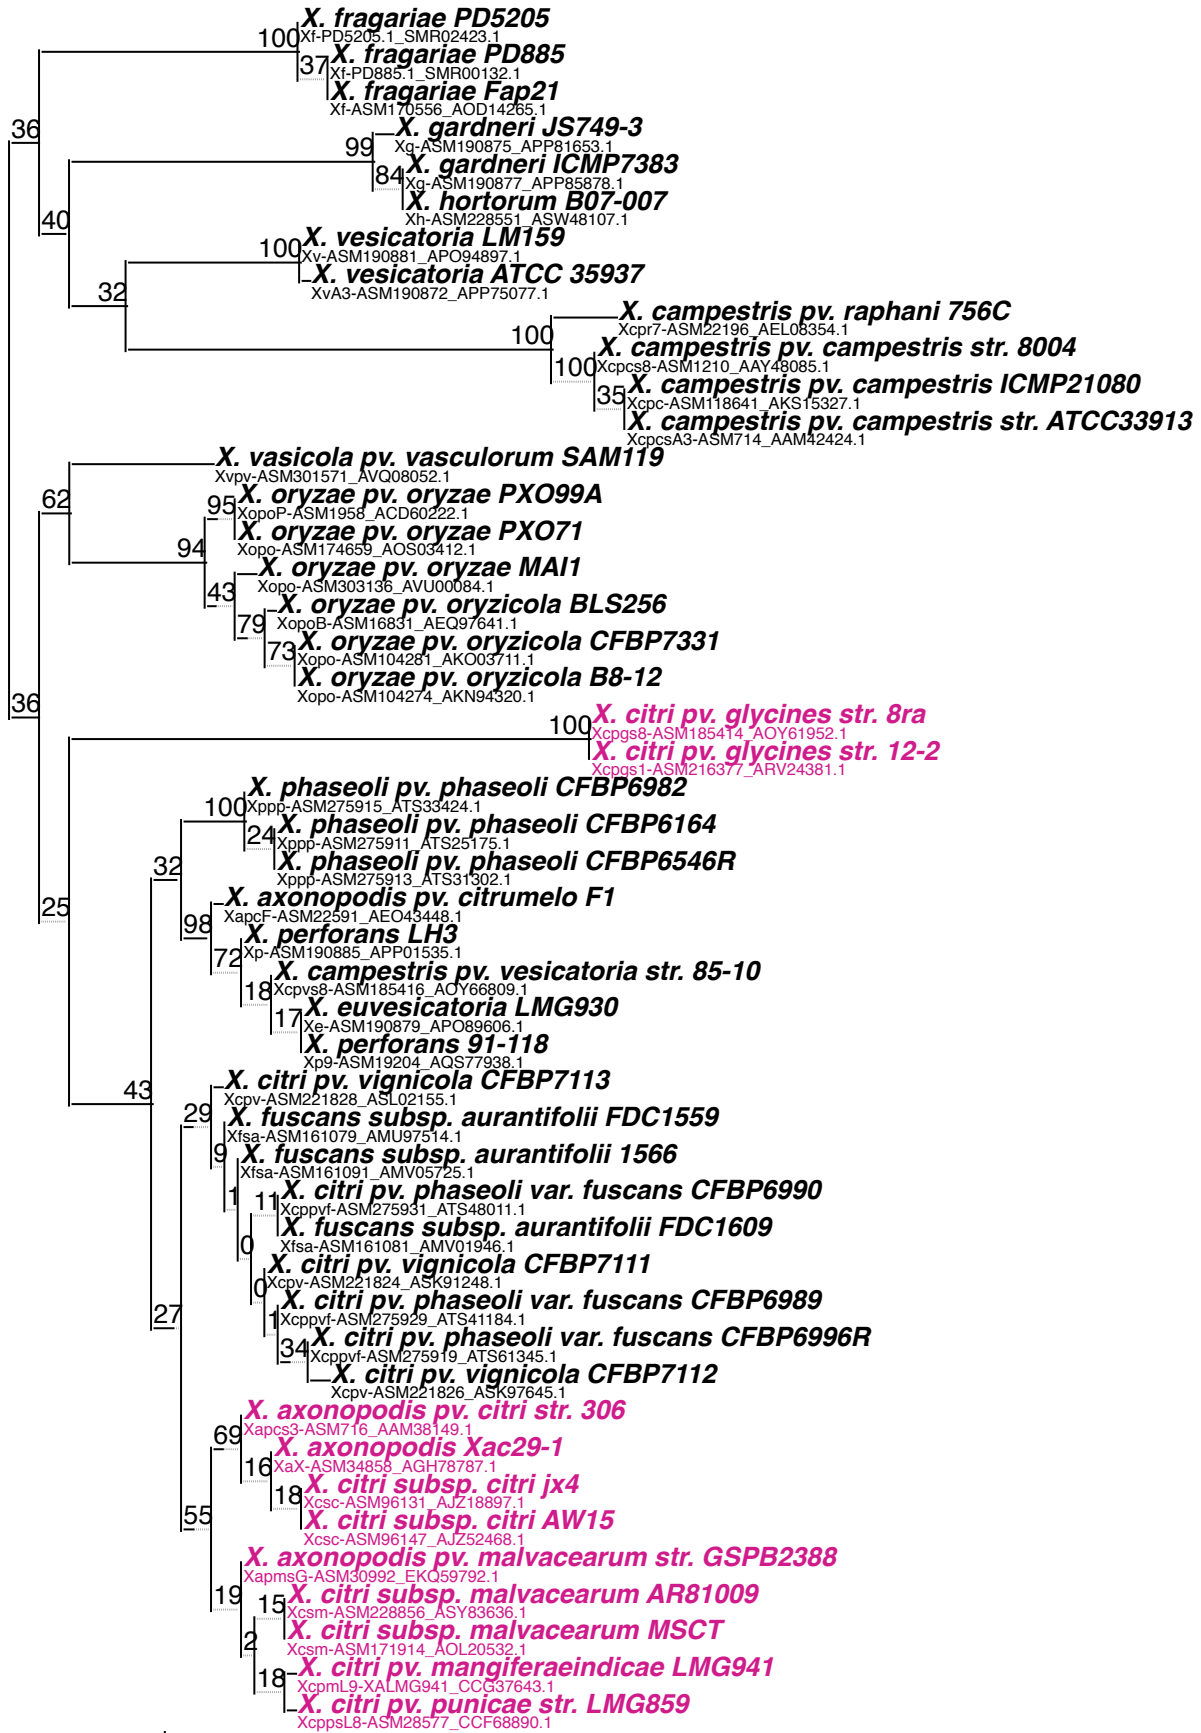

0.06



s) OG0001639 (Rieske [2Fe-2S] domain-containing protein)

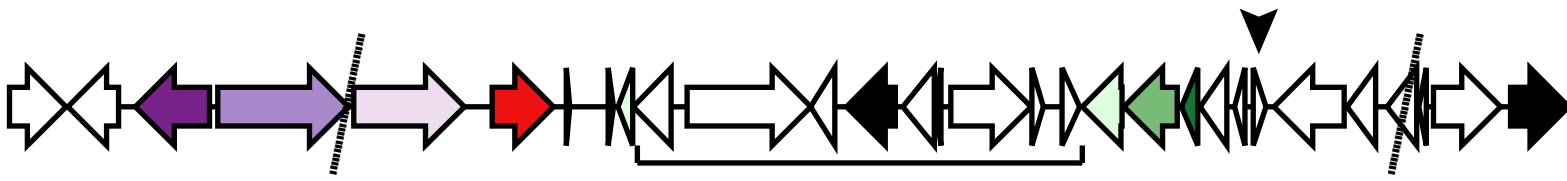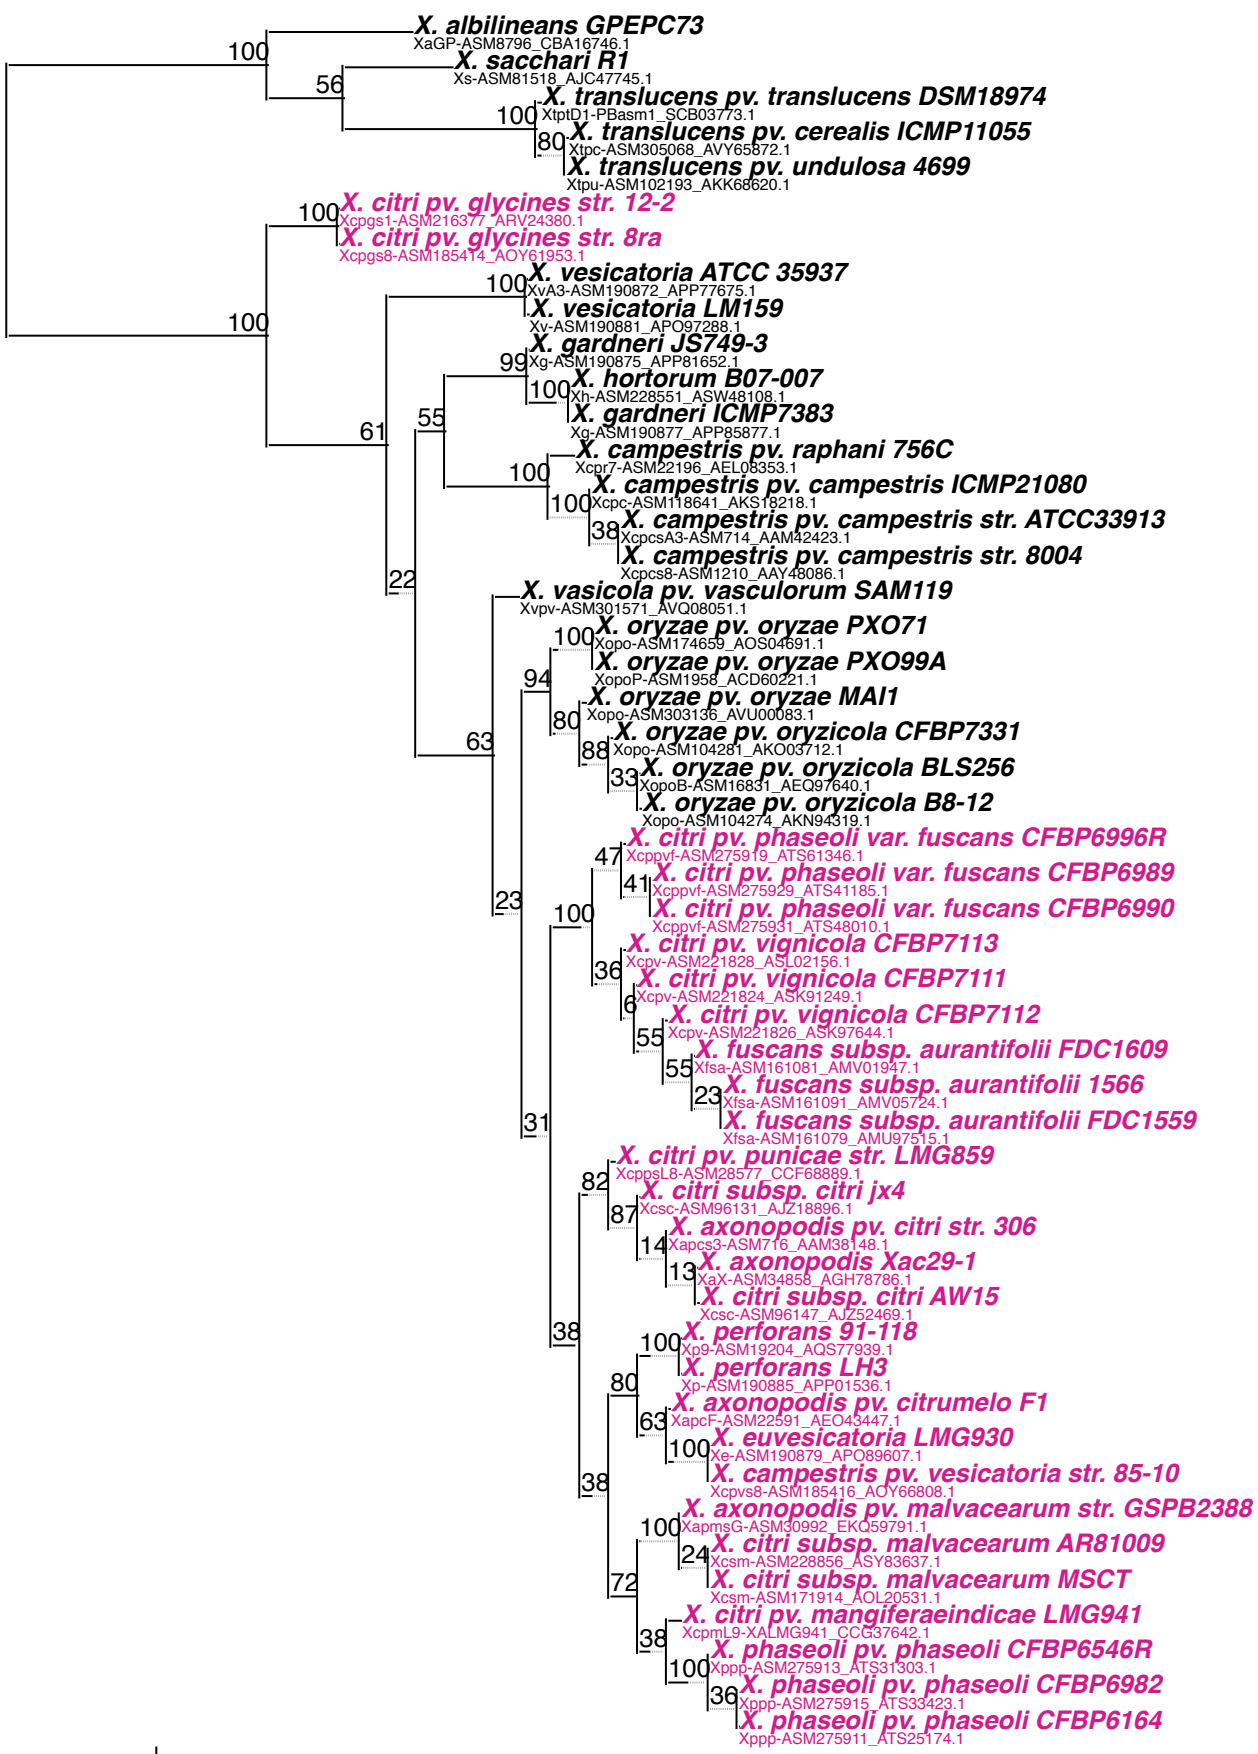

0.18

t) OG0001483 (citrate transporter)

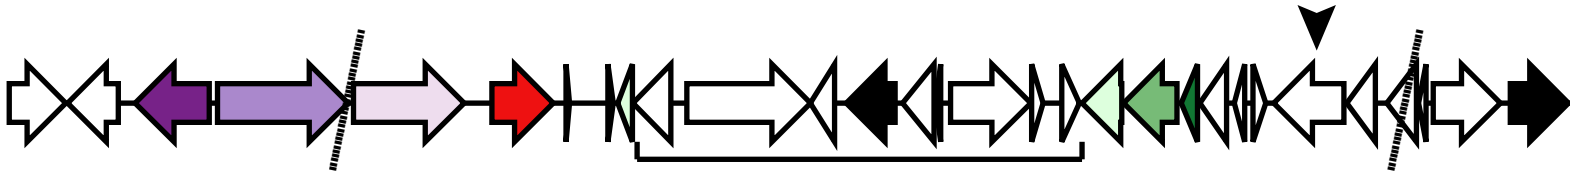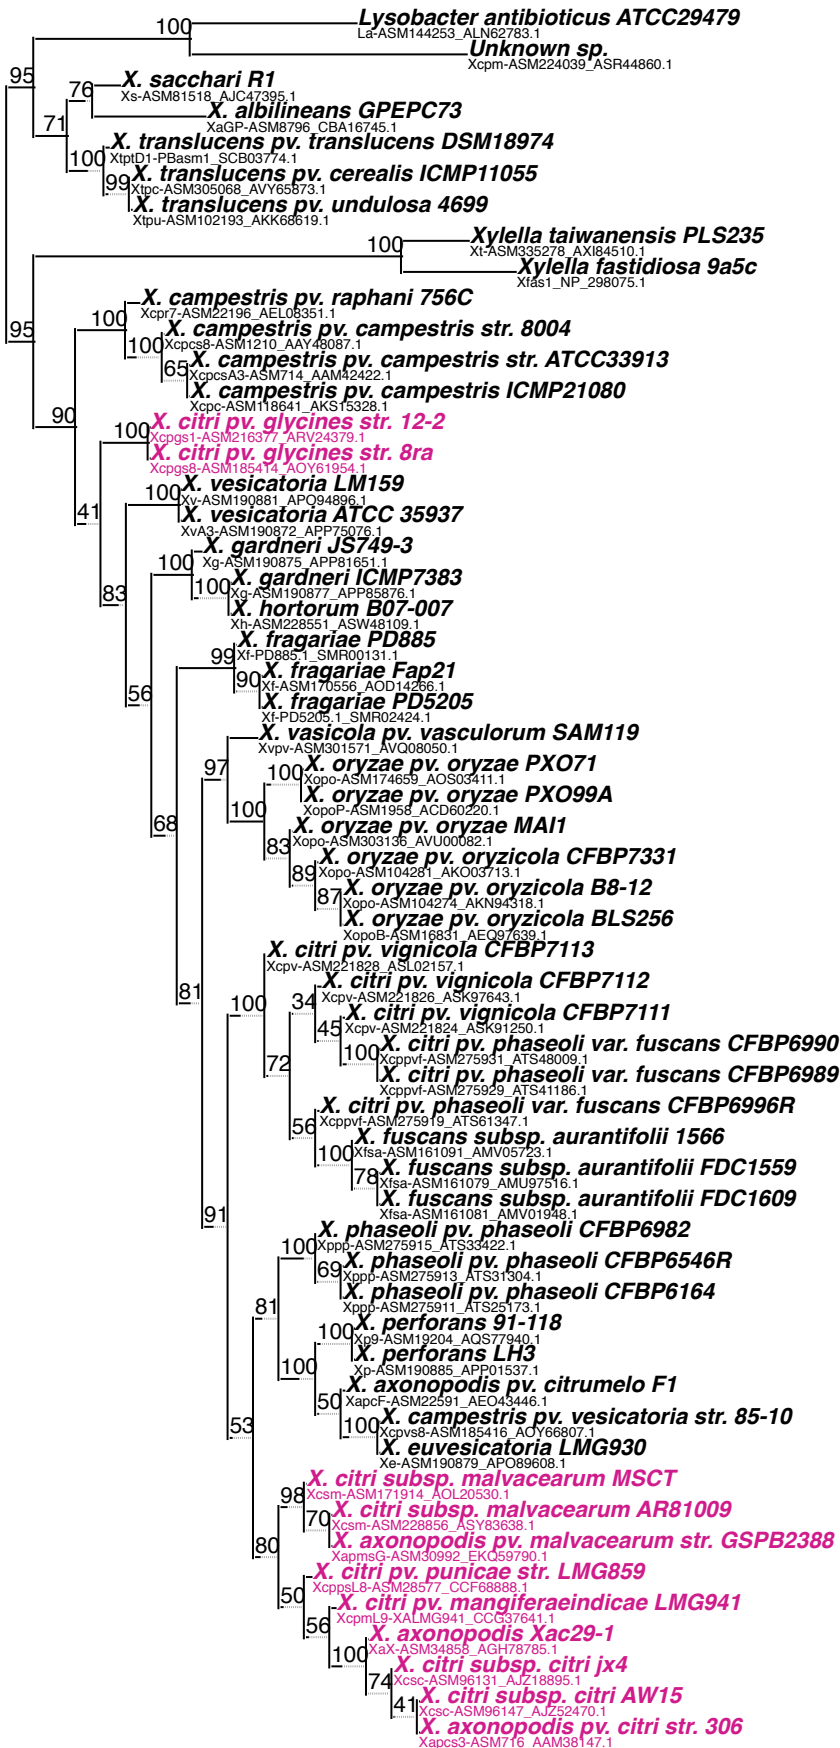

0.14

u) OG0001080 (putative methyltransferase)

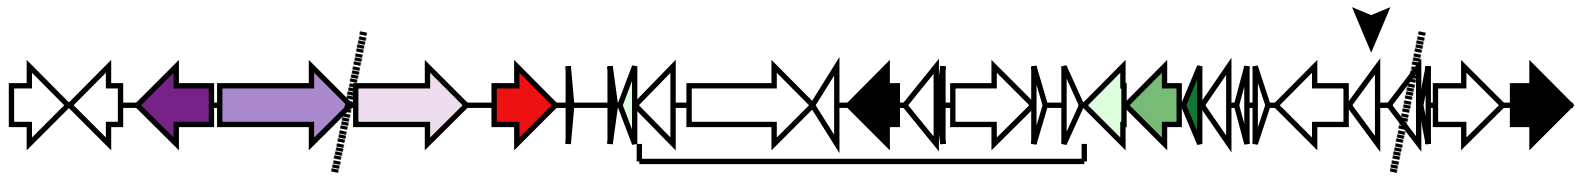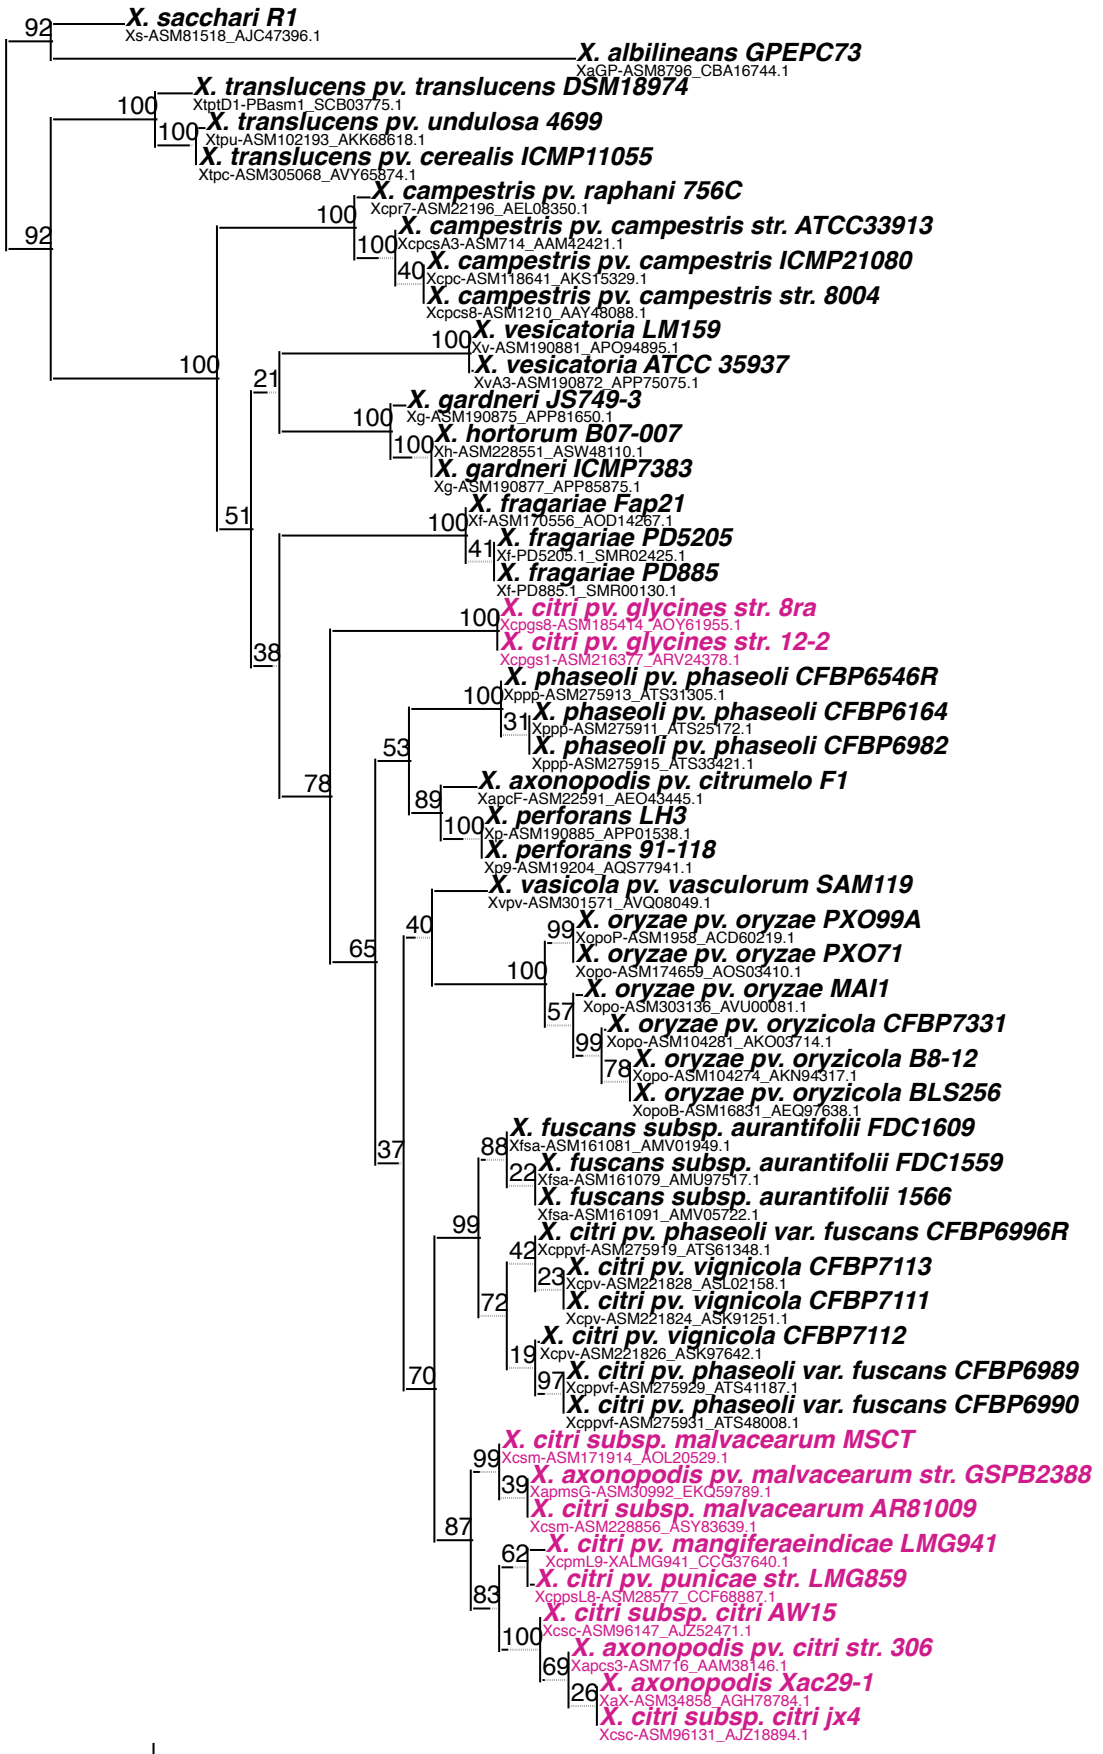

0.09

v) OG0000801, partition 2 (thiazole biosynthesis protein thiG)

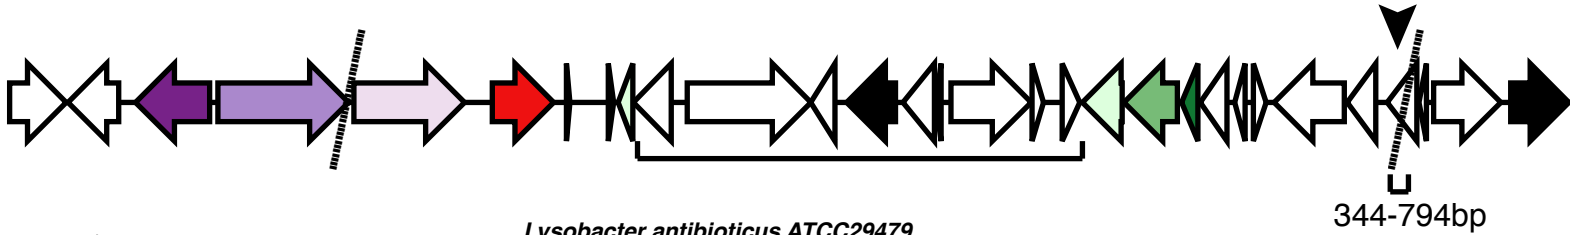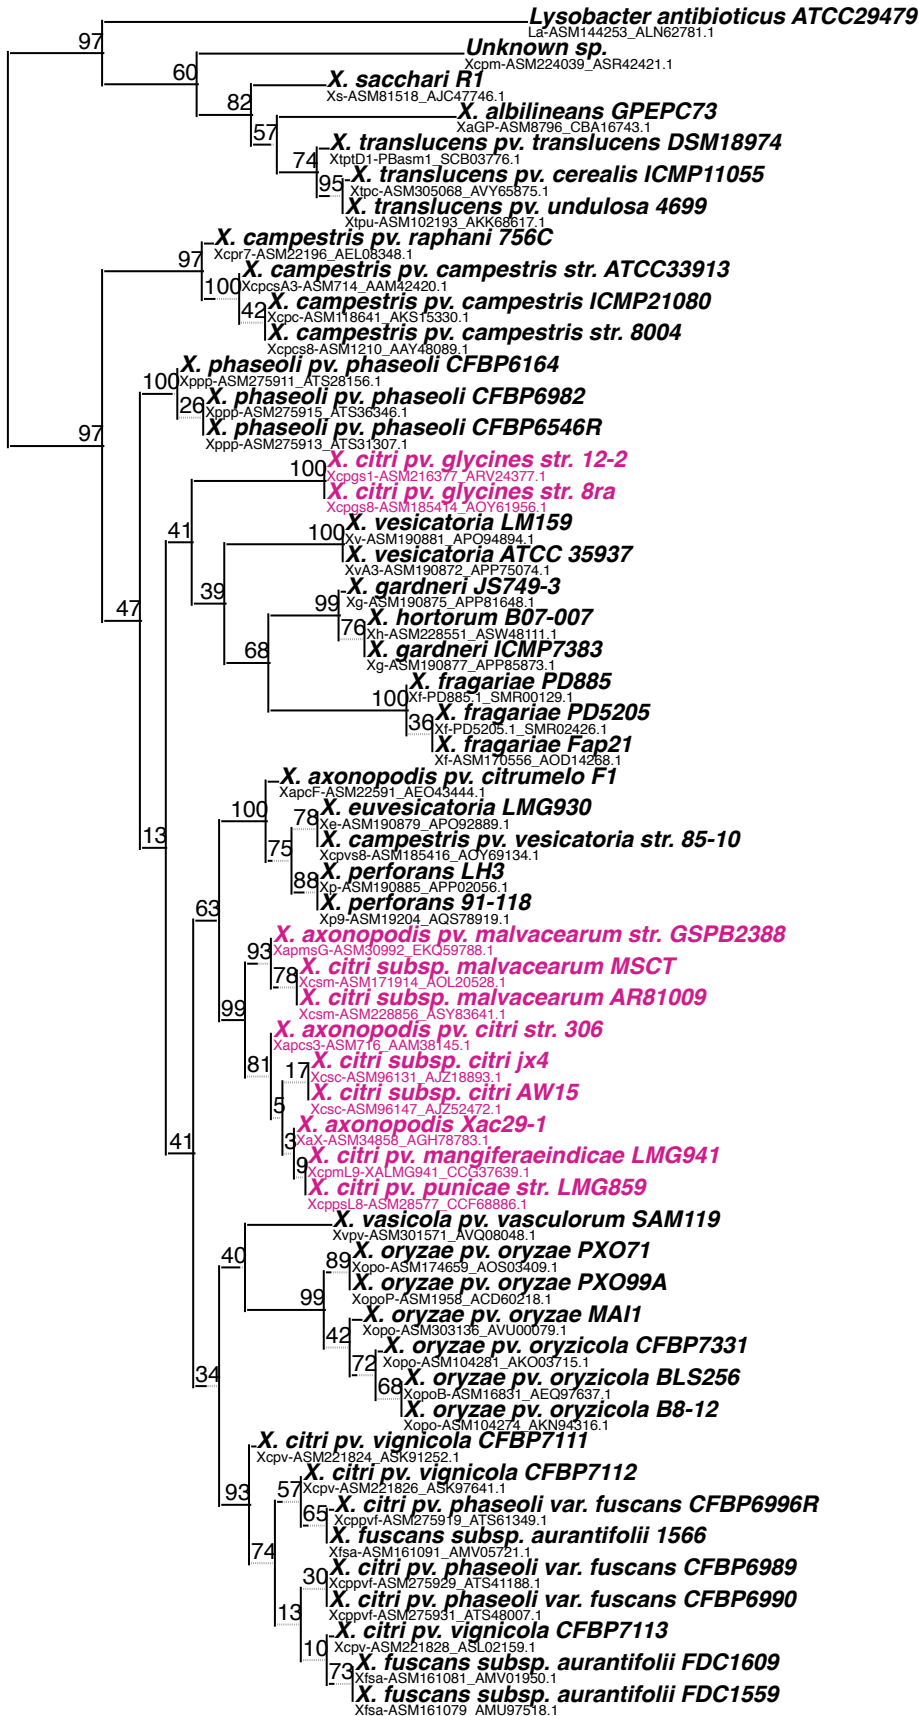

0.07

w) OG0000801, partition 1 (thiazole biosynthesis protein thiG)

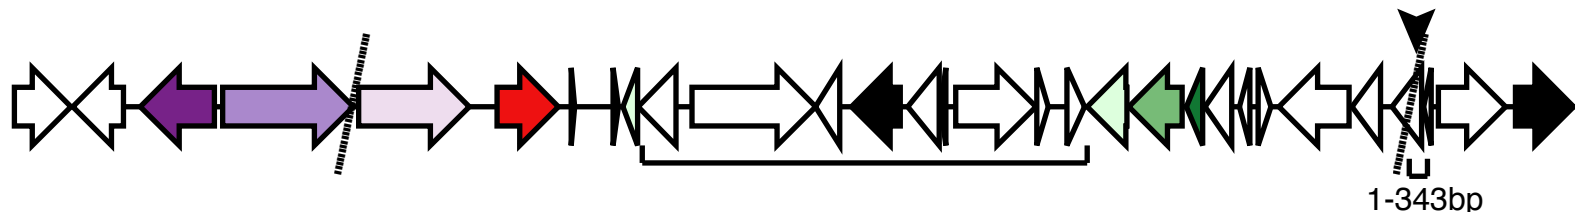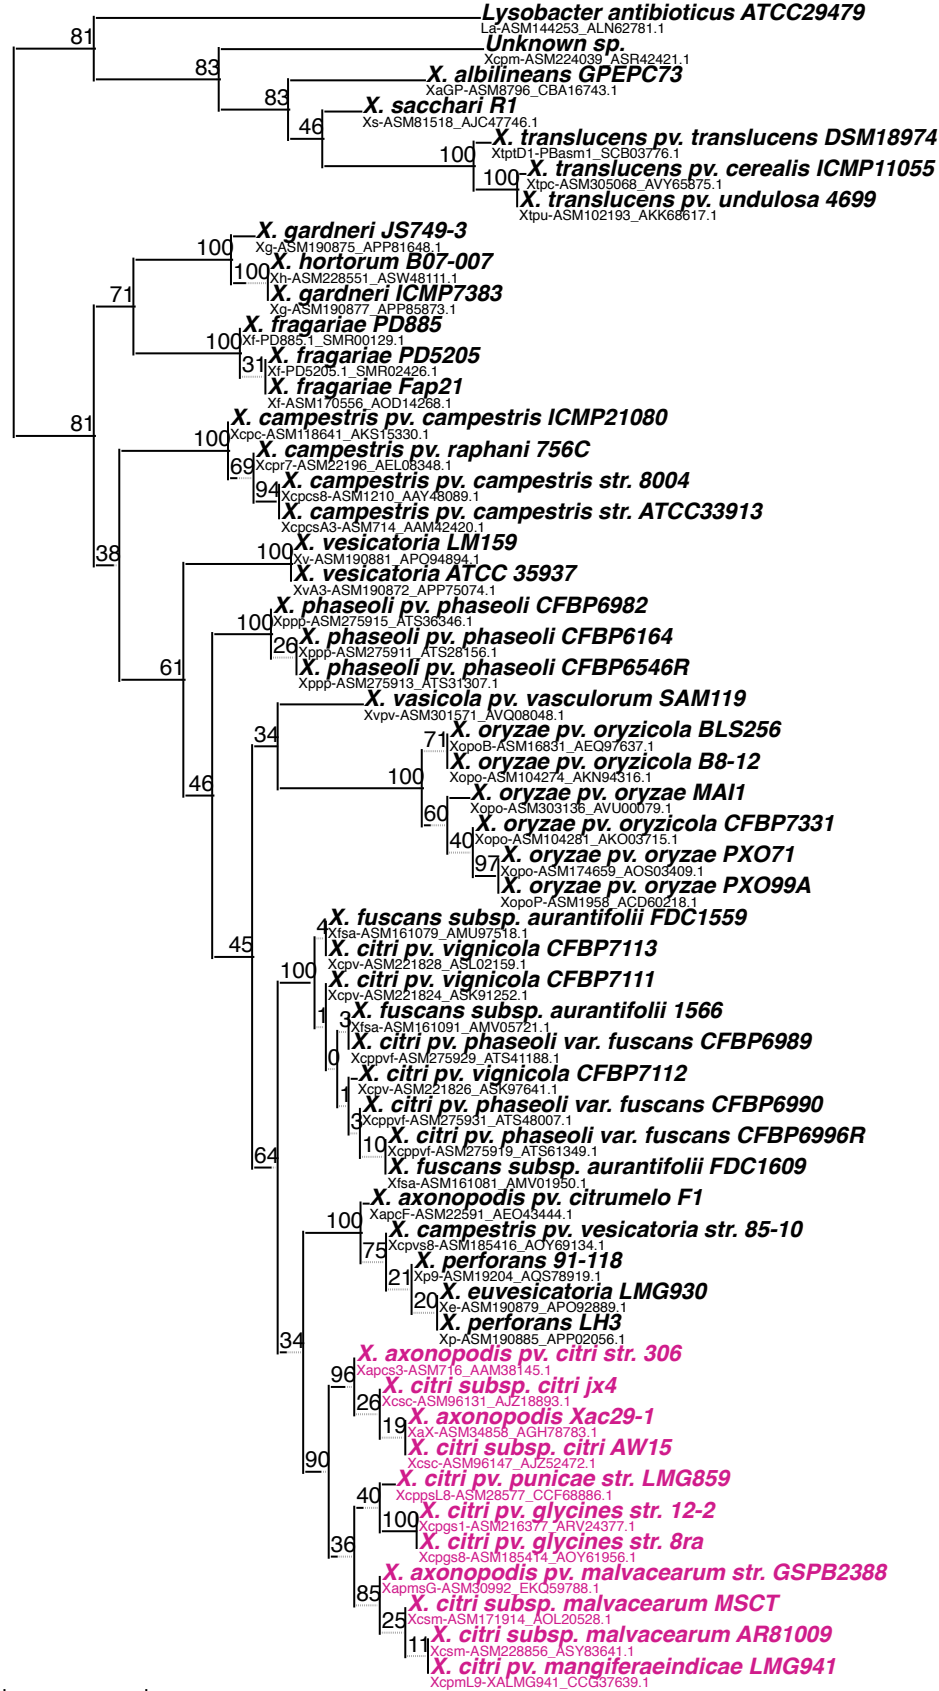

0.06





y) OG0001453 (esterase)

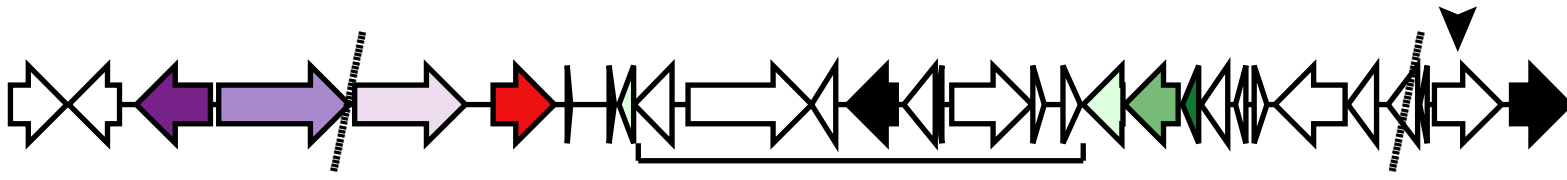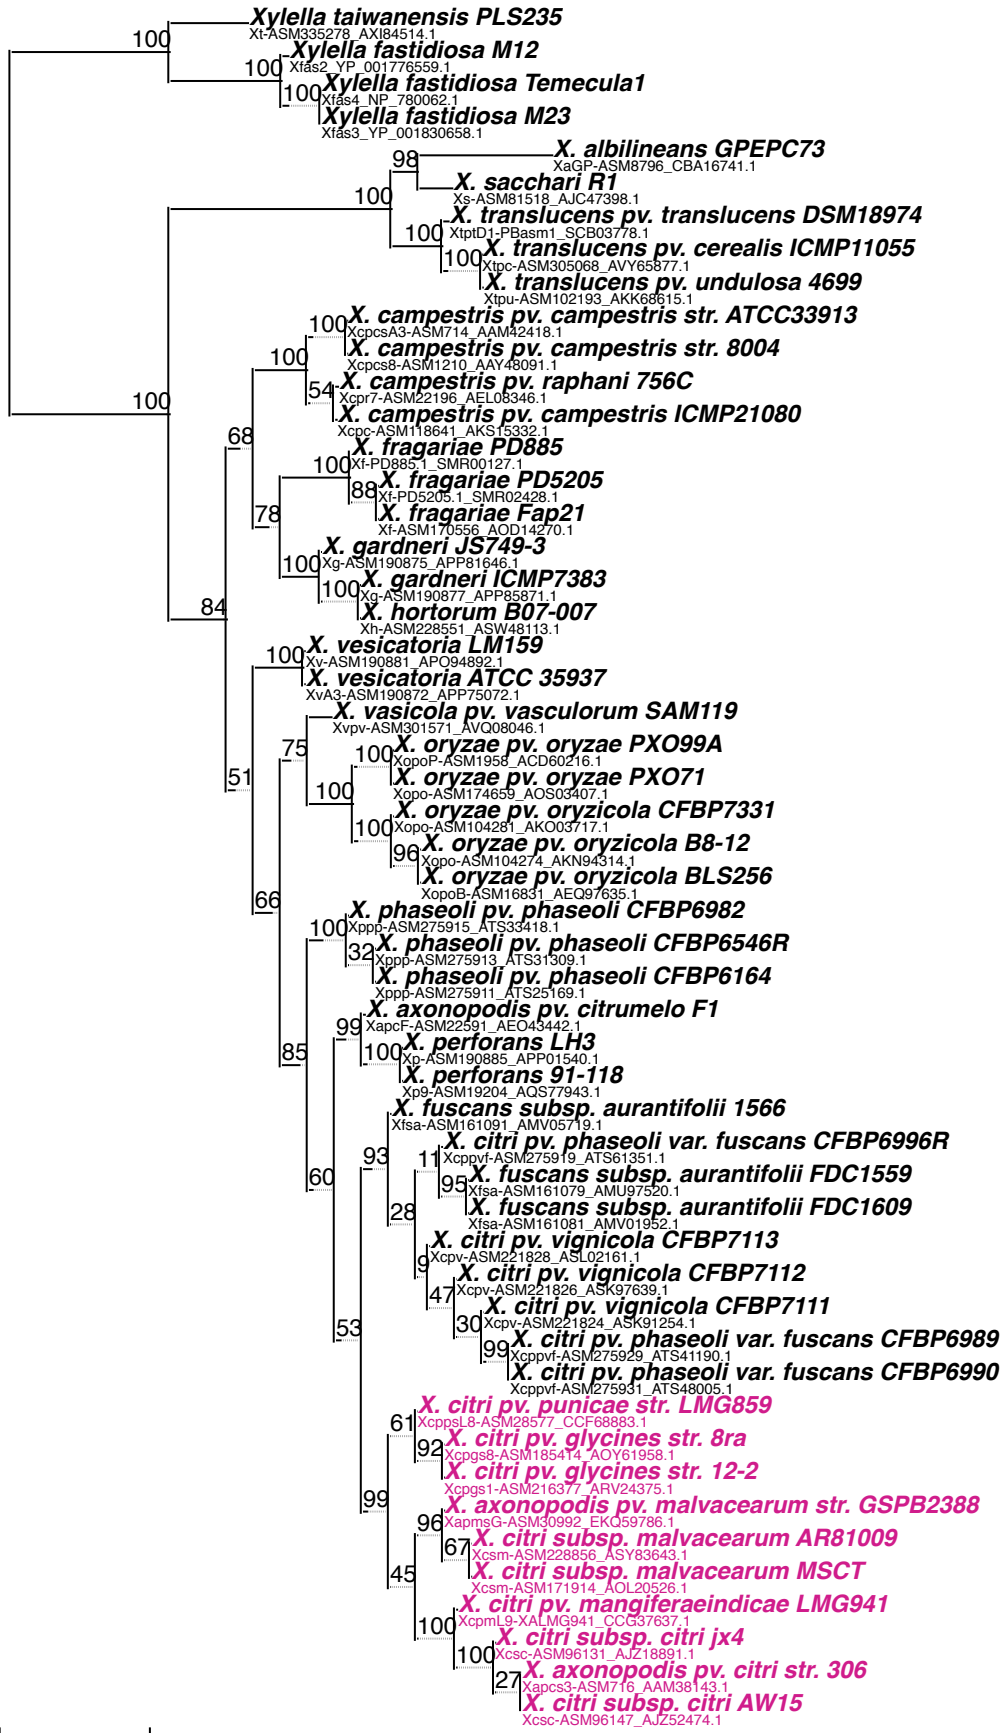

0.19
