# Supplementary material for: Repeated gain and loss of a single gene modulates the evolution of vascular plant pathogen lifestyles
Source: PubMed Central journal article supplement (PMC7673761; doi:10.1126/sciadv.abc4516), 2020-11-13
Supplement: abc4516_Figure_S8.pdf [file abc4516_Figure_S8.pdf]

a) OG0001552 (magnesium and cobalt transport protein)

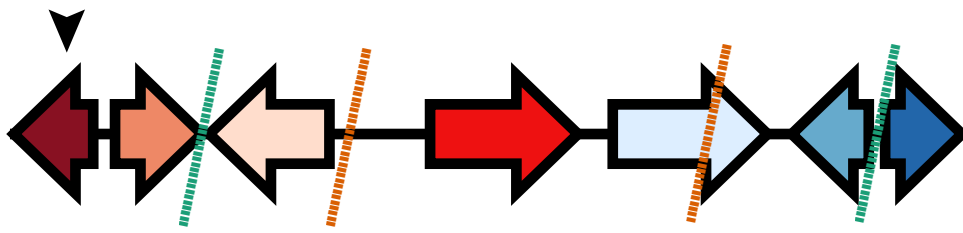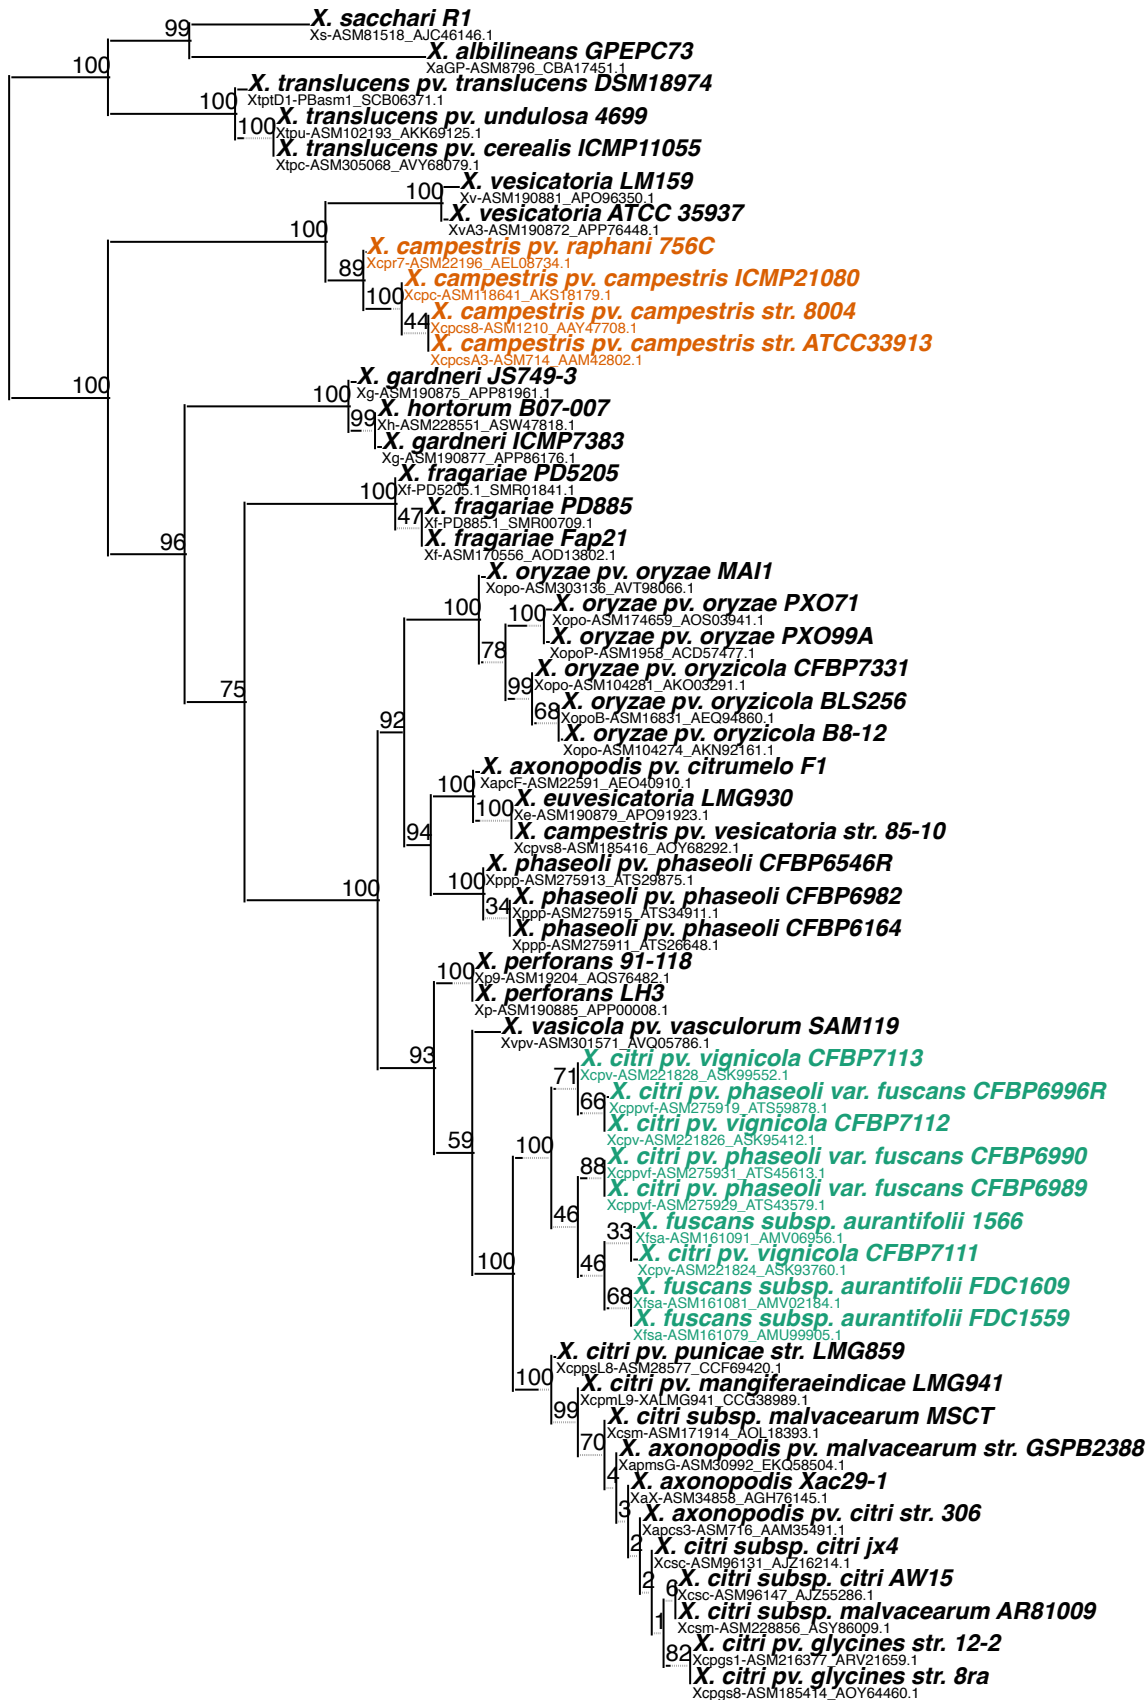

0.07

b) OG0002828 (function unknown)

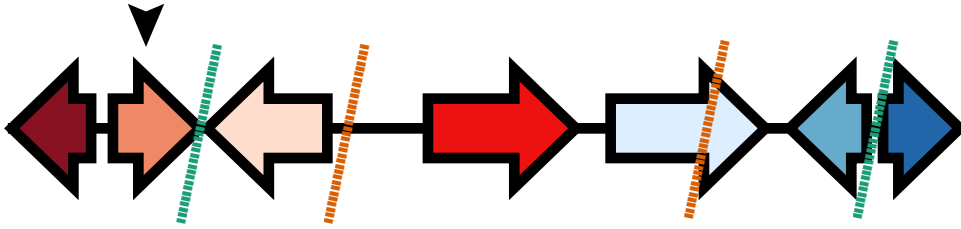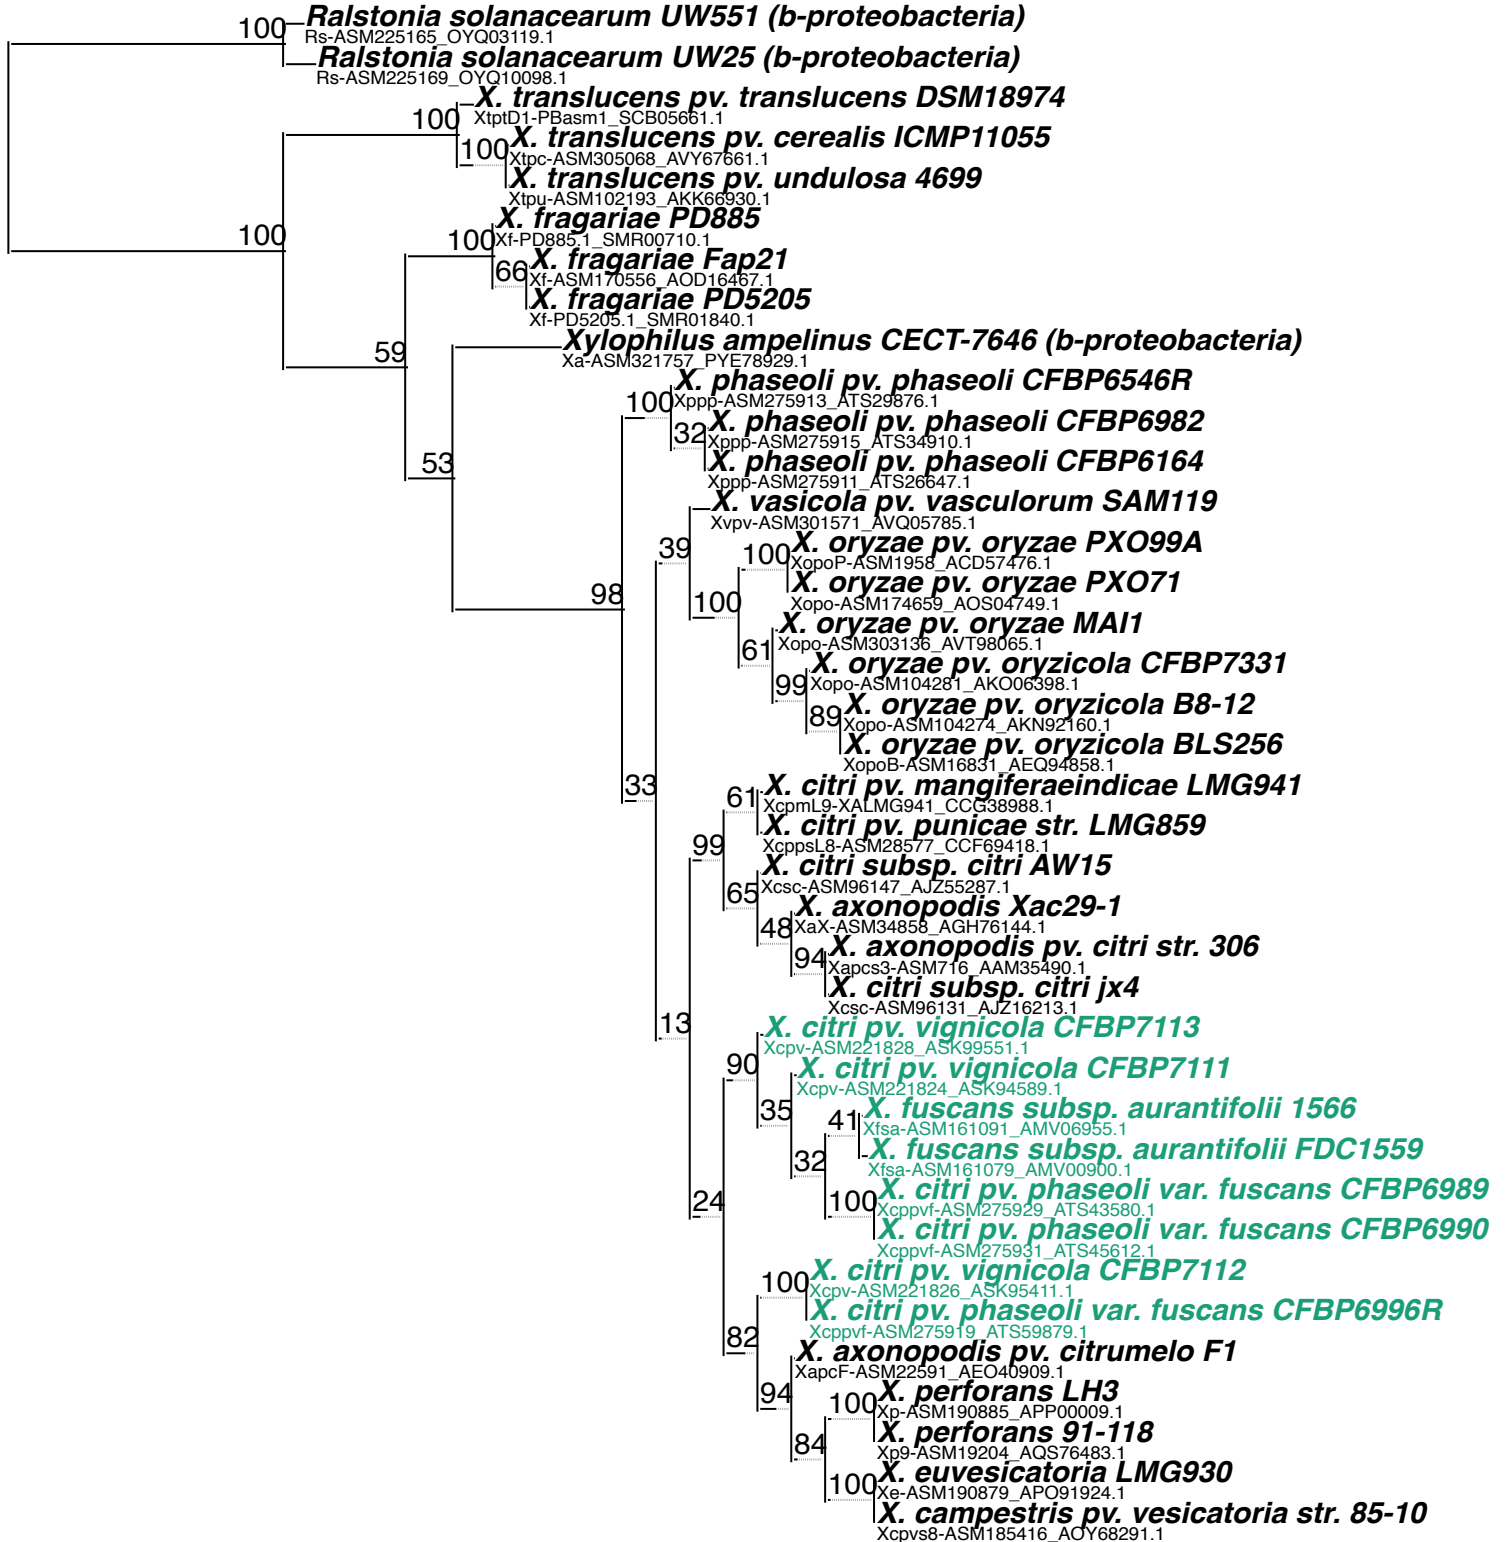

0.42

c) OG0000035 and 5' UTR, partition 2 (amino acid permease)

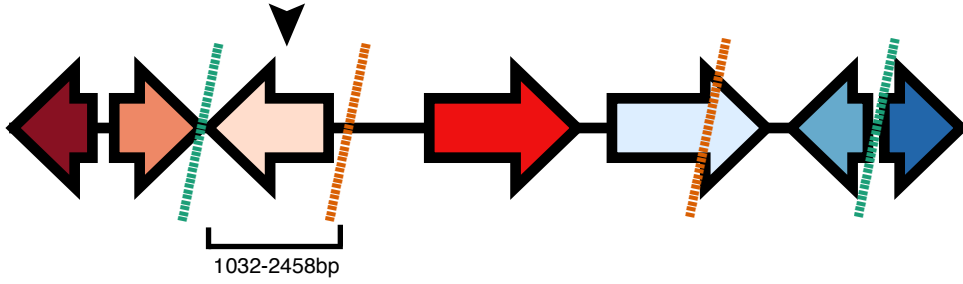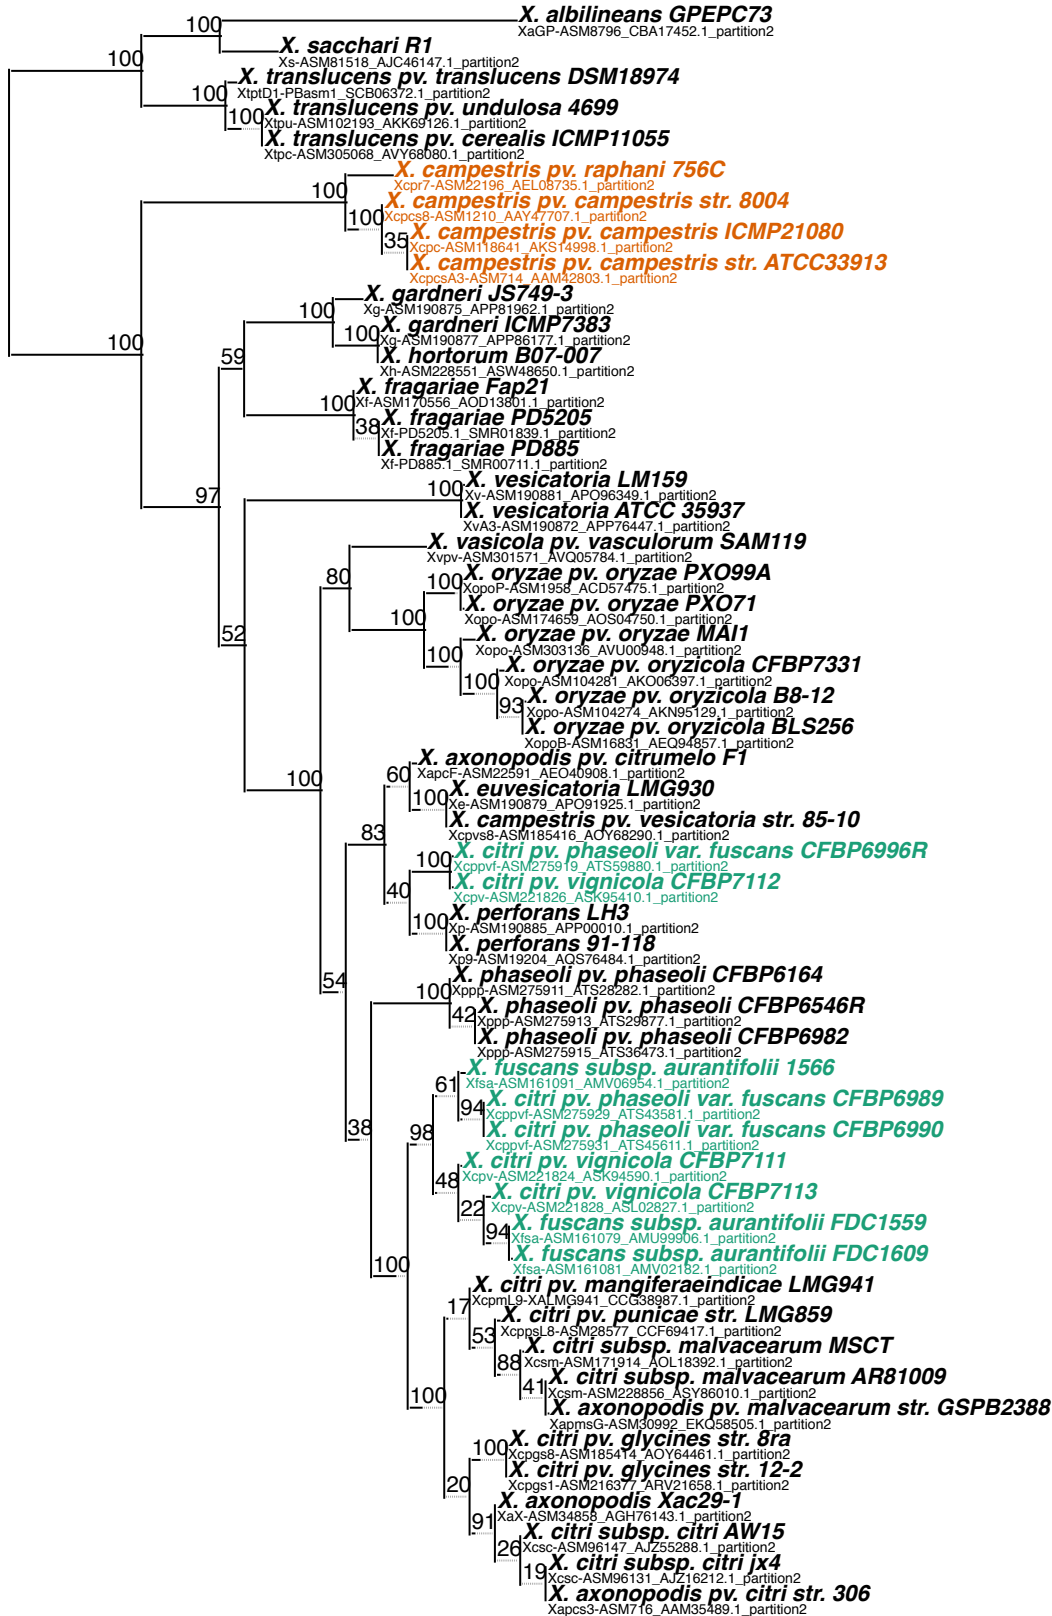

0.06

d) OG0000035 and 5' UTR, partition 1 (amino acid permease)

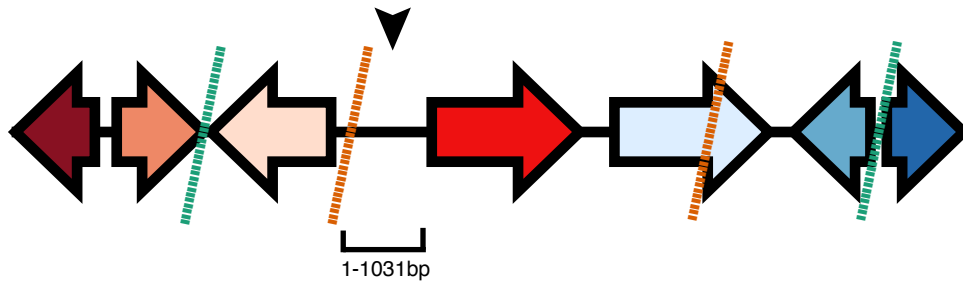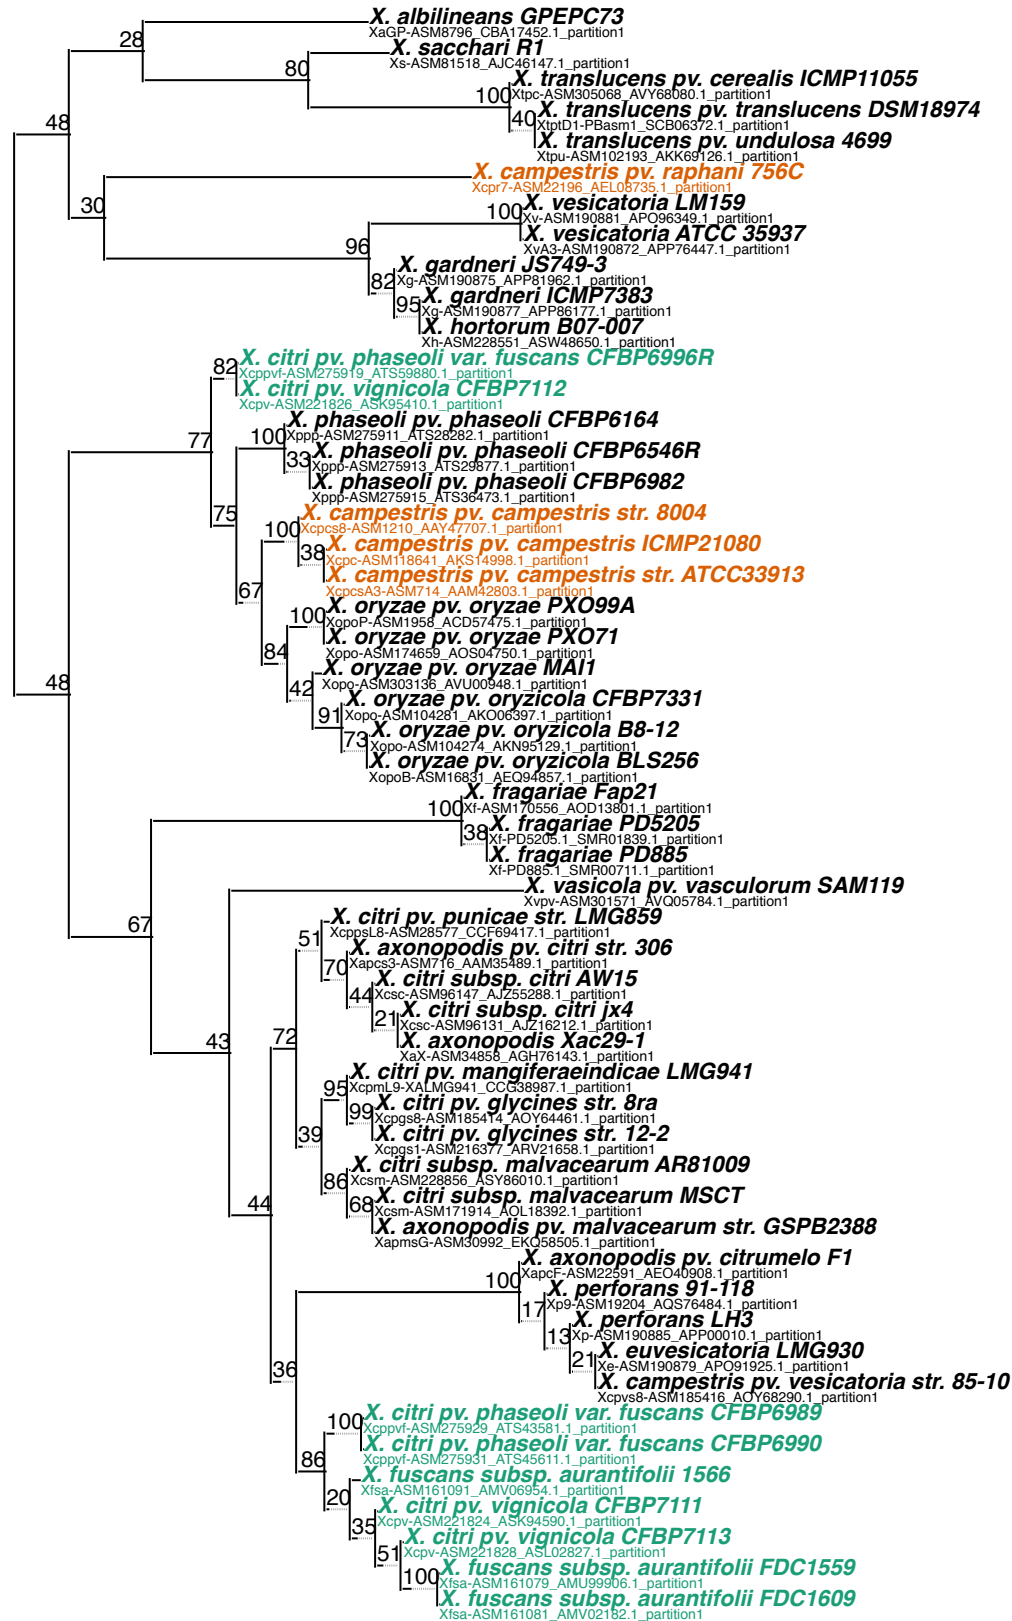

0.27

e) OG0000234, partition 1 (cellulase)

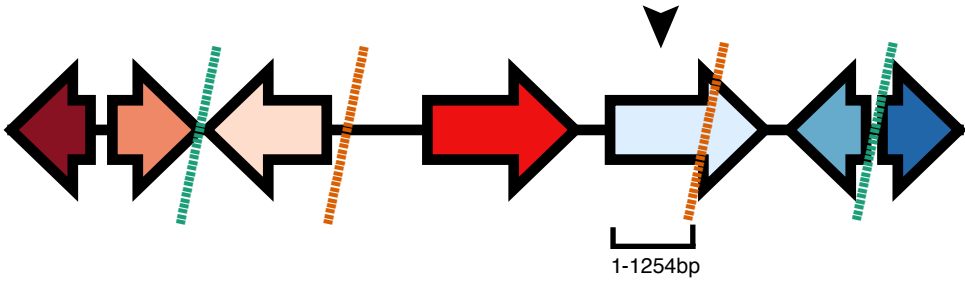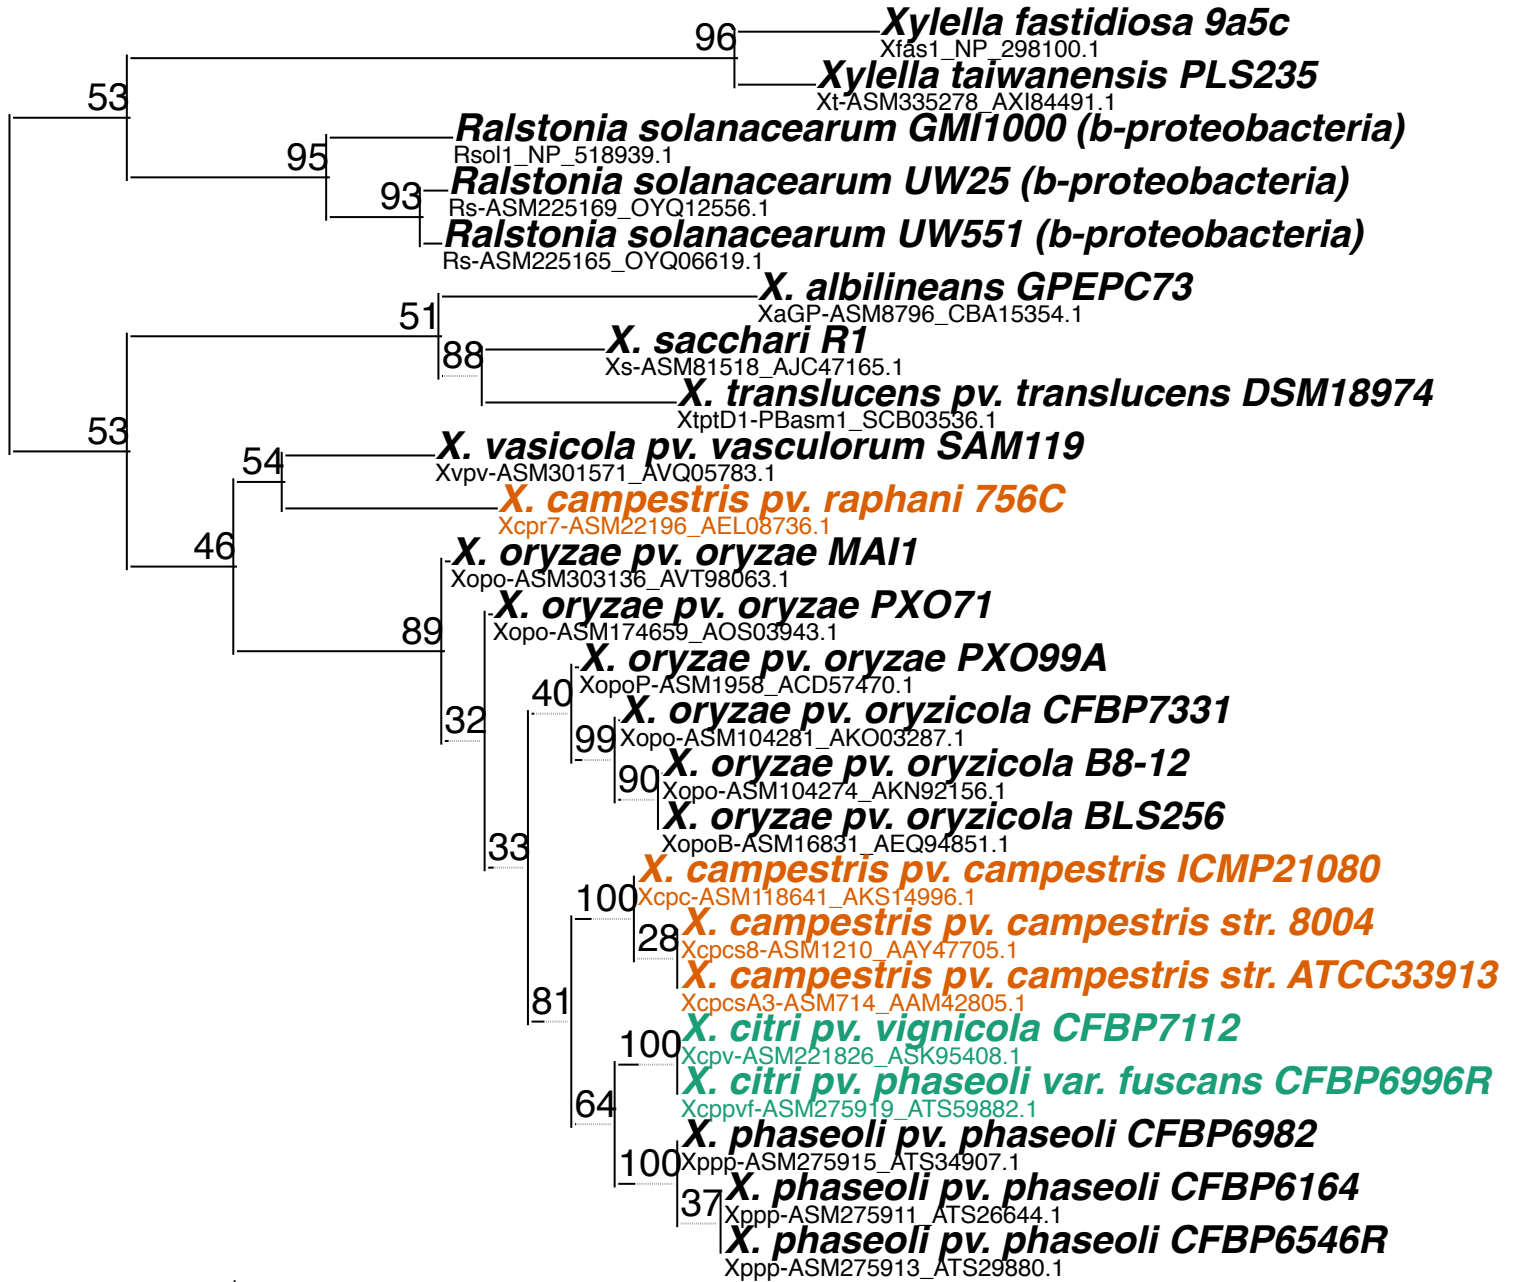

0.27



f) OG0000234, partition 2 (cellulase)

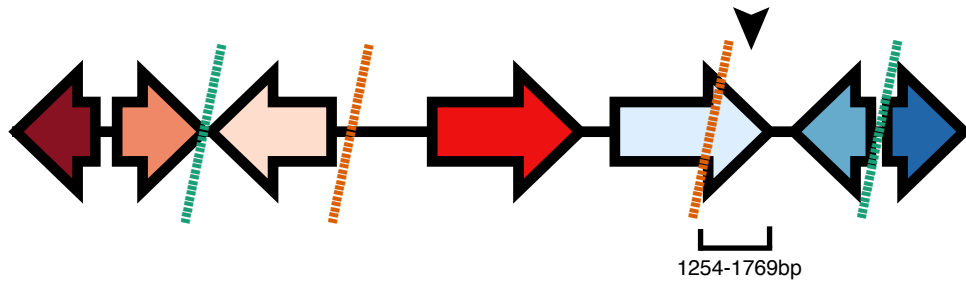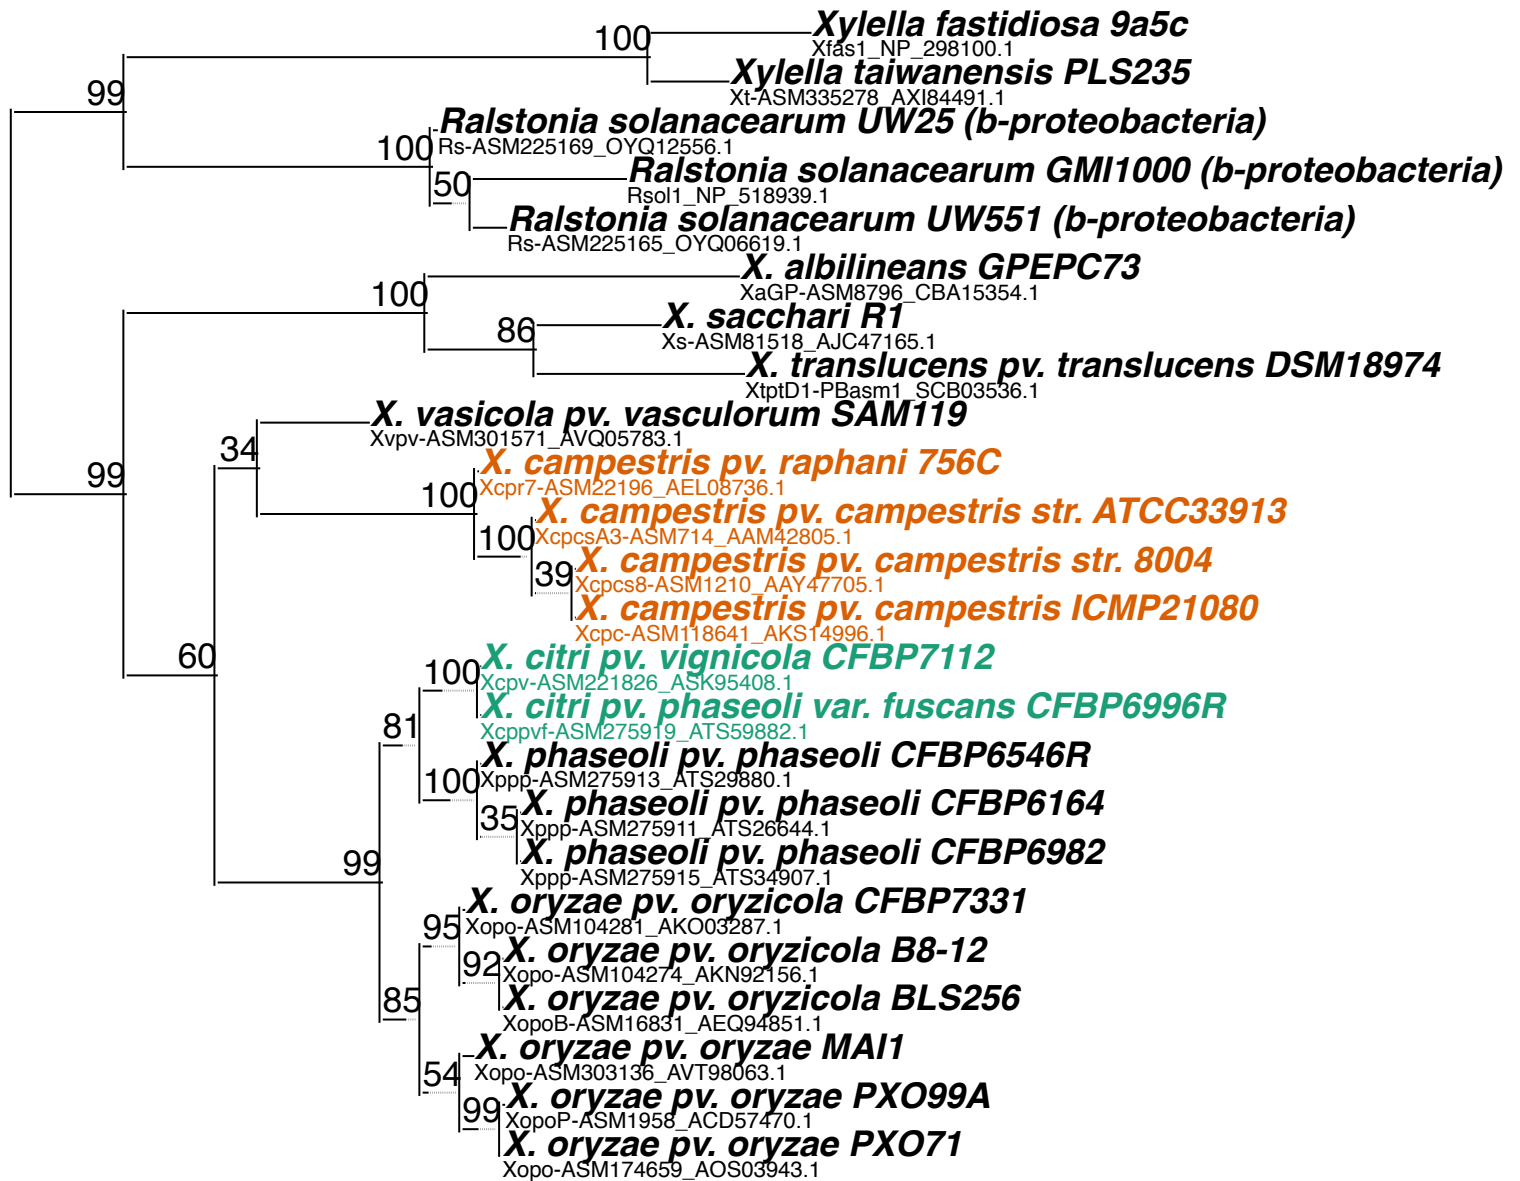

0.16

g) OG0002434 (integral membrane protein)

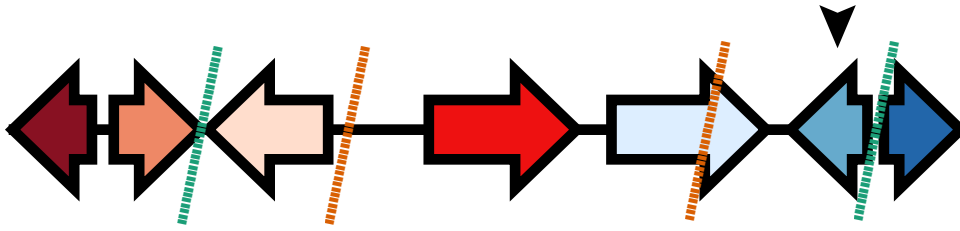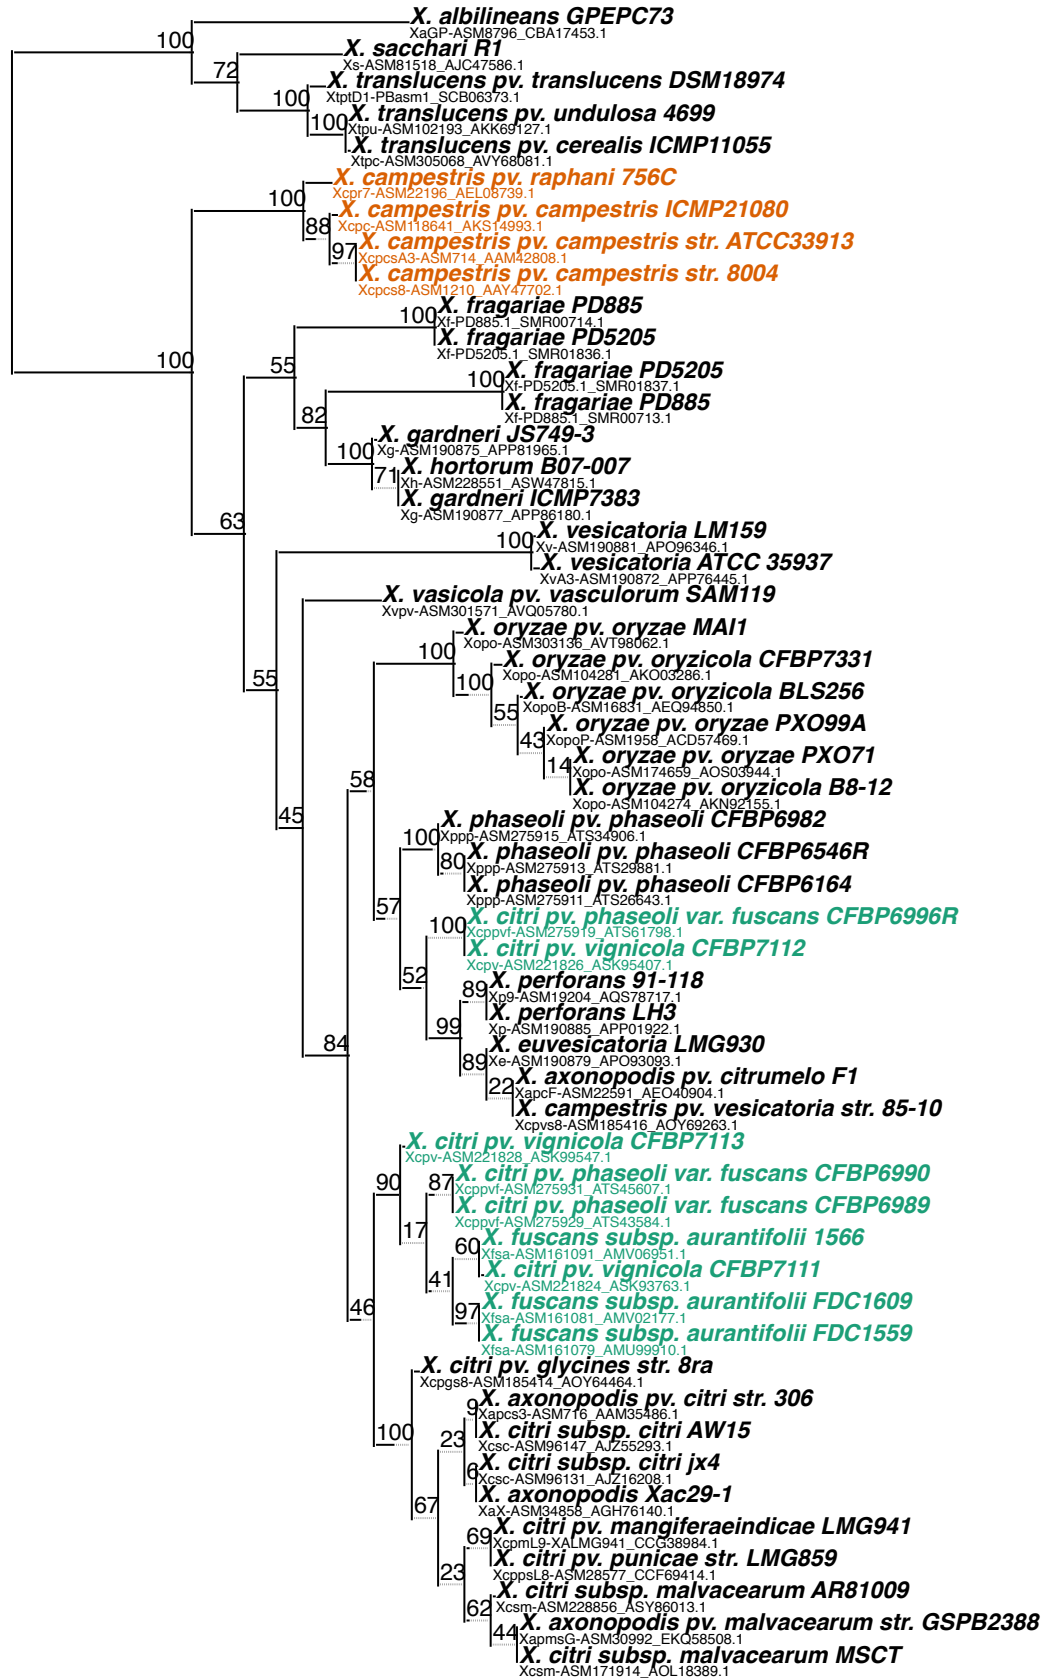

0.08

# h) OG0002170 (methyltransferase)

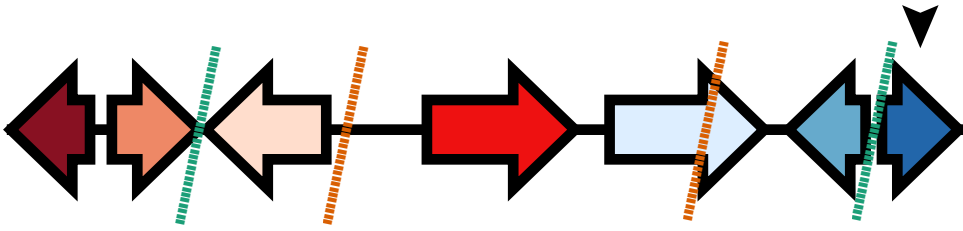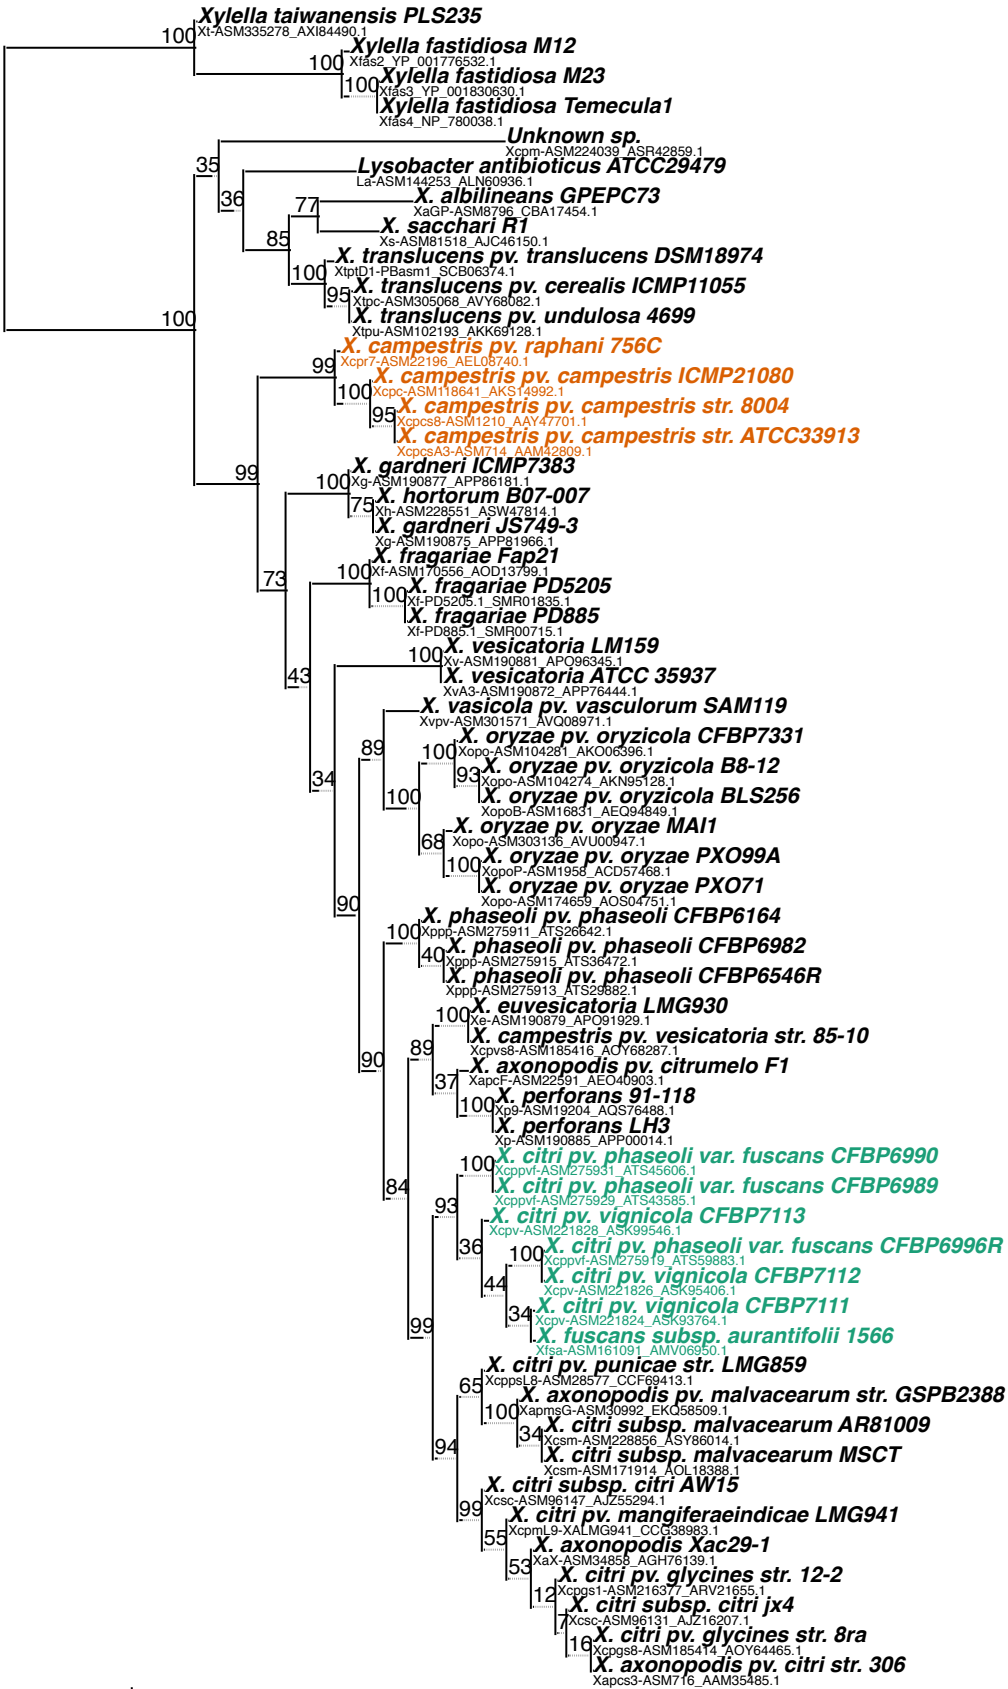

0.22
